# Supplementary material for: The growth and the decay of a visco-elastocapillary ridge by localized forces
Source: Royal Society of Chemistry journal article supplement (doi:10.1039/d2sm00913g), 2022-01-01
Supplement: d2sm00913g1.bib [file d2sm00913g1.bib]

@article{Jerison2011,
abstract = {Young's classic analysis of the equilibrium of a three-phase contact line ignores the out-of-plane component of the liquid-vapor surface tension. While it is expected that this unresolved force is balanced by the elastic response of the solid, a definitive analysis has remained elusive because of an apparent divergence of stress at the contact line. While a number of theories have been presented to cut off the divergence, none of them have provided reasonable agreement with experimental data. We measure surface and bulk deformation of a thin elastic film near a three-phase contact line using fluorescence confocal microscopy. The out-of-plane deformation is well fit by a linear elastic theory incorporating an out-of-plane restoring force due to the surface tension of the solid substrate. This theory predicts that the deformation profile near the contact line is scale-free and independent of the substrate elastic modulus. {\textcopyright} 2011 American Physical Society.},
archivePrefix = {arXiv},
arxivId = {1104.1741},
author = {Jerison, Elizabeth R. and Xu, Ye and Wilen, Larry A. and Dufresne, Eric R.},
doi = {10.1103/PhysRevLett.106.186103},
eprint = {1104.1741},
file = {:Users/takshingchan/Desktop/papers/wetting on elastic surface/ridge/PhysRevLett.106.186103.pdf:pdf},
issn = {00319007},
journal = {Physical Review Letters},
number = {18},
pages = {1--4},
title = {{Deformation of an elastic substrate by a three-phase contact line}},
volume = {106},
year = {2011}
}
@article{Park2014,
abstract = {One of the most questionable issues in wetting is the force balance that includes the vertical component of liquid surface tension. On soft solids, the vertical component leads to a microscopic protrusion of the contact line, that is, a 'wetting ridge'. The wetting principle determining the tip geometry of the ridge is at the heart of the issues over the past half century. Here we reveal a universal wetting principle from the ridge tips directly visualized with high spatio-temporal resolution of X-ray microscopy. We find that the cusp of the ridge is bent with an asymmetric tip, whose geometry is invariant during ridge growth or by surface softness. This singular asymmetry is deduced by linking the macroscopic and microscopic contact angles to Young and Neuman laws, respectively. Our finding shows that this dual-scale approach would be contributable to a general framework in elastowetting, and give hints to issues in cell-substrate interaction and elasto-capillary problems. {\textcopyright} 2014 Macmillan Publishers Limited. All rights reserved.},
author = {Park, Su Ji and Weon, Byung Mook and Lee, Ji San and Lee, Junho and Kim, Jinkyung and Je, Jung Ho},
doi = {10.1038/ncomms5369},
file = {:Users/takshingchan/Desktop/papers/wetting on elastic surface/ridge/ncomms5369 (1).pdf:pdf},
issn = {20411723},
journal = {Nature Communications},
pages = {1--7},
publisher = {Nature Publishing Group},
title = {{Visualization of asymmetric wetting ridges on soft solids with X-ray microscopy}},
volume = {5},
year = {2014}
}
@article{Reiter2018,
abstract = {A short overview of relevant processes and parameters in spreading of liquids on substrates is presented. In a simplified view, the dynamics of these processes can be understood as being controlled by the balance of driving forces and resistance due to dissipative processes. Analogies between spreading and dewetting are discussed.},
author = {Reiter, G{\"{u}}nter},
doi = {10.1007/978-3-319-55411-2_5},
file = {:Users/takshingchan/Desktop/papers/wetting on elastic surface/ridge/Nature379432a0.pdf:pdf},
isbn = {9783319554112},
journal = {Handbook of Adhesion Technology: Second Edition},
number = {FEBRUARY},
pages = {101--113},
title = {{Spreading of liquids on substrates}},
volume = {1-2},
year = {2018}
}
@article{Liang2018,
abstract = {Results of the coarse-grained molecular dynamics simulations are used to show that the force balance analysis at the triple-phase contact line formed at an elastic substrate has to include a quartet of forces: three surface tensions (surface free energies) and an elastic force per unit length. In the case of the contact line formed by a droplet on an elastic substrate an elastic force is due to substrate deformation generated by formation of the wetting ridge. The magnitude of this force fel is proportional to the product of the ridge height h and substrate shear modulus G. Similar elastic line force should be included in the force analysis at the triple-phase contact line of a solid particle in contact with an elastic substrate. For this contact problem elastic force obtained from contact angles and surface tensions is a sum of the elastic forces acting from the side of a solid particle and an elastic substrate. By considering only three line forces acting at the triple-phase contact line, one implicitly accounts the bulk stress contribution as a part of the resultant surface stresses. This "contamination" of the surface properties by a bulk contribution could lead to unphysically large values of the surface stresses in soft materials.},
author = {Liang, Heyi and Cao, Zhen and Wang, Zilu and Dobrynin, Andrey V.},
doi = {10.1021/acs.langmuir.8b01680},
file = {:Users/takshingchan/Desktop/papers/wetting on elastic surface/AboutForceAtCL/acs.langmuir.8b01680 (2).pdf:pdf},
issn = {15205827},
journal = {Langmuir},
number = {25},
pages = {7497--7502},
pmid = {29847135},
title = {{Surface Stresses and a Force Balance at a Contact Line}},
volume = {34},
year = {2018}
}
@article{Style2013,
abstract = {Droplets deform soft substrates near their contact lines. Using confocal microscopy, we measure the deformation of silicone gel substrates due to glycerol and fluorinated-oil droplets for a range of droplet radii and substrate thicknesses. For all droplets, the substrate deformation takes a universal shape close to the contact line that depends on liquid composition, but is independent of droplet size and substrate thickness. This shape is determined by a balance of interfacial tensions at the contact line and provides a novel method for direct determination of the surface stresses of soft substrates. Moreover, we measure the change in contact angle with droplet radius and show that Young's law fails for small droplets when their radii approach an elastocapillary length scale. For larger droplets the macroscopic contact angle is constant, consistent with Young's law. {\textcopyright} 2013 American Physical Society.},
archivePrefix = {arXiv},
arxivId = {1209.3723},
author = {Style, Robert W. and Boltyanskiy, Rostislav and Che, Yonglu and Wettlaufer, J. S. and Wilen, Larry A. and Dufresne, Eric R.},
doi = {10.1103/PhysRevLett.110.066103},
eprint = {1209.3723},
file = {:Users/takshingchan/Desktop/papers/wetting on elastic surface/Style_Dufresne/PhysRevLett.110.066103.pdf:pdf},
issn = {00319007},
journal = {Physical Review Letters},
number = {6},
pages = {1--5},
title = {{Universal deformation of soft substrates near a contact line and the direct measurement of solid surface stresses}},
volume = {110},
year = {2013}
}
@article{Weijs2013,
abstract = {The capillary forces exerted by liquid drops and bubbles on a soft solid are directly measured using molecular dynamics simulations. The force on the solid by the liquid near the contact line is neither oriented along the liquid vapor interface nor perpendicular to the solid surface, as usually assumed, but points towards the liquid. It is shown that the elastic deformations induced by this force can only be explained if, in contrast to an incompressible liquid, the surface stress is different from the surface energy. Using thermodynamic variations we show that the surface stress and the surface energy can both be determined accurately by measuring the deformation of a slender body plunged in a liquid. The results obtained from molecular dynamics fully confirm those recently obtained experimentally [Marchand et al., Phys. Rev. Lett., (2012), 108, 094301] for an elastomeric wire. {\textcopyright} 2013 The Royal Society of Chemistry.},
archivePrefix = {arXiv},
arxivId = {1303.6779},
author = {Weijs, Joost H. and Andreotti, Bruno and Snoeijer, Jacco H.},
doi = {10.1039/c3sm50861g},
eprint = {1303.6779},
file = {:Users/takshingchan/Desktop/papers/wetting on elastic surface/AboutForceAtCL/c3sm50861g.pdf:pdf},
issn = {1744683X},
journal = {Soft Matter},
number = {35},
pages = {8494--8503},
title = {{Elasto-capillarity at the nanoscale: On the coupling between elasticity and surface energy in soft solids}},
volume = {9},
year = {2013}
}
@article{Lei2018,
abstract = {The singularities in 2-D time domain boundary element (TD-BEM) formulation for elastodynamics are divided into three categories: the wave front singularity, the space singularity and the dual singularity. A fully analytical procedure for dealing with the three singularities is proposed by adopting the concept of the finite part of an integral (Hadamard principle integral). In order to reduce the computation time, the conventional numerical procedure is adopted for the non-singular integrals in 2-D TD-BEM formulation. Therefore, the algorithm including the fully analytical procedure for dealing with singular integrals and the numerical procedure for dealing with non-singular integrals is implemented in this study. Two examples, 1-D rod and 2-D cavity representing the problems for the finite domain and the infinite domain respectively, are chosen to verify the effectiveness of the proposed algorithm. It shows that the results obtained from the proposed algorithm agree with the analytical solutions with good accuracy, indicating that the proposed algorithm is applicable for elastodynamics in both finite and infinite domains.},
author = {Lei, Weidong and Li, Hongjun and Qin, Xiaofei and Chen, Rui and Ji, Duofa},
doi = {10.1016/j.apm.2017.12.019},
file = {:Users/takshingchan/Desktop/papers/wetting on elastic surface/BEM/viscoelastic/1-s2.0-S0307904X17307503-main.pdf:pdf},
issn = {0307904X},
journal = {Applied Mathematical Modelling},
keywords = {Elastodynamics,Hadamard principle integral,Singular integral,Time domain boundary element method (TD-BEM)},
pages = {612--625},
publisher = {Elsevier Inc.},
title = {{Dynamics-based analytical solutions to singular integrals for elastodynamics by time domain boundary element method}},
url = {https://doi.org/10.1016/j.apm.2017.12.019},
volume = {56},
year = {2018}
}
@article{Gaul1999,
abstract = {As an alternative to domain discretization methods, the boundary element method (BEM) provides a powerful tool for the calculation of dynamic structural response in frequency and time domain. Field equations of motion and boundary conditions are cast into boundary integral equations (BIE), which are discretized only on the boundary. Fundamental solutions are used as weighting functions in the BIE which fulfil the Sommerfeld radiation condition, i.e., the energy radiation into a surrounding medium is modelled correctly. Therefore, infinite and semi-infinite domains can be effectively treated by the method. The soil represents such a semi-infinite domain in soil-structure-interaction problems. The response to vibratory loads superimposed to static pre-loads can often be calculated by linear viscoelastic constitutive equations. Conventional viscoelastic constitutive equations can be generalized by taking fractional order time derivatives into account. In the present paper two time domain BEM approaches including generalized viscoelastic behaviour are compared with the Laplace domain BEM approach and subsequent numerical inverse transformation. One of the presented time domain approaches uses an analytical integration of the elastodynamic BIE in a time step. Viscoelastic constitutive properties are introduced after Laplace transformation by means of an elastic-viscoelastic correspondence principle. The transient response is obtained by inverse transformation in each time step. The other time domain approach is based on the so-called 'convolution quadrature method'. In this formulation, the convolution integral in the BIE is numerically approximated by a quadrature formula whose weights are determined by the same Laplace transformed fundamental solutions used in the first method and a linear multistep method. A numerical study of wave propagation problems in 3-d viscoelastic continuum is performed for comparing the three BEM formulations.},
author = {Gaul, L. and Schanz, M.},
doi = {10.1016/S0045-7825(99)00032-8},
file = {:Users/takshingchan/Desktop/papers/wetting on elastic surface/BEM/viscoelastic/1-s2.0-S0045782599000328-main.pdf:pdf},
isbn = {7116856277},
issn = {00457825},
journal = {Computer Methods in Applied Mechanics and Engineering},
number = {1-2},
pages = {111--123},
title = {{A comparative study of three boundary element approaches to calculate the transient response of viscoelastic solids with unbounded domains}},
volume = {179},
year = {1999}
}
@article{Gonzalez2004,
abstract = {In this paper a novel approach to the problem of steady state moving loads along the boundary of a linear-viscoelastic two-dimensional (2D) solid, without considering the inertial effects, is presented. Using the Correspondence Principle, a closed form of the fundamental solution for a static load inside a 2D viscoelastic space can be easily obtained. This solution is later extended to the particular case of a load traveling with constant velocity along the x axis. An Eulerian description of the motion is adopted using a reference system that is moving with the load, which makes the problem time independent. Finally, this formulation is introduced into a traditional Boundary Element scheme and tested by solving some problems. {\textcopyright} 2003 Elsevier Ltd. All rights reserved.},
author = {Gonz{\'{a}}lez, Jos{\'{e}} A. and Abascal, Ram{\'{o}}n},
doi = {10.1016/j.enganabound.2003.10.005},
file = {:Users/takshingchan/Desktop/papers/wetting on elastic surface/BEM/viscoelastic/1-s2.0-S0955799703001851-main.pdf:pdf},
issn = {09557997},
journal = {Engineering Analysis with Boundary Elements},
keywords = {Boundary element method,Steady-state moving loads,Viscoelasticity},
number = {7},
pages = {815--823},
title = {{Linear viscoelastic boundary element formulation for steady state moving loads}},
volume = {28},
year = {2004}
}
@article{Zhang2010,
abstract = {Deformations such as crack opening and sliding displacements in a cracked viscoelastic body are numerically investigated by the extended finite element method (XFEM). The solution is carried out directly in time domain with a mesh not conforming to the crack geometry. The generalized Heaviside function is used to reflect the displacement discontinuity across a crack surface while the basis functions extracted from the viscoelastic asymptotic fields are used to manifest the gradient singularity at a crack tip. With these treatments, the XFEM formulations are derived in an incremental form. In evaluating the stiffness matrix, a selective integration scheme is suggested for problems with high Poisson ratios often encountered in viscoelastic materials over different element types in the XFEM. Numerical examples show that the crack opening displacement and crack sliding displacement are satisfactory. {\textcopyright} 2010 Elsevier Ltd. All rights reserved.},
author = {Zhang, H. H. and Rong, G. and Li, L. X.},
doi = {10.1016/j.enganabound.2010.02.001},
file = {:Users/takshingchan/Desktop/papers/wetting on elastic surface/BEM/viscoelastic/1-s2.0-S0955799710000184-main.pdf:pdf},
issn = {09557997},
journal = {Engineering Analysis with Boundary Elements},
keywords = {Crack,Deformations,Linear viscoelasticity,XFEM},
number = {6},
pages = {619--624},
publisher = {Elsevier},
title = {{Numerical study on deformations in a cracked viscoelastic body with the extended finite element method}},
url = {http://dx.doi.org/10.1016/j.enganabound.2010.02.001},
volume = {34},
year = {2010}
}
@article{Zhou2019,
abstract = {The boundary element method (BEM) has been implemented in elasticity problems very successfully because of its high accuracy. However, there are very few investigations about BEM with concentrated loads. The displacement at the concentrated load point is infinite and traditional elements will lead inaccurate results near the concentrated load point. This paper proposes two types of displacement singular elements to approximate the displacement near concentrated load point, and high accuracy can be obtained without refinement. The second type of displacement singular element is a general element type, which can work well for both problems with or without boundary concentrated loads. Numerical examples have been studied and compared with results obtained by traditional BEM and finite element method (FEM) to show the necessary of the proposed methods.},
author = {Zhou, Wei and Yue, Qiang and Wang, Qiao and Feng, Y. T. and Chang, Xiaolin},
doi = {10.1016/j.enganabound.2018.11.016},
file = {:Users/takshingchan/Desktop/papers/wetting on elastic surface/BEM/viscoelastic/1-s2.0-S0955799718303722-main (1).pdf:pdf},
issn = {09557997},
journal = {Engineering Analysis with Boundary Elements},
keywords = {Boundary element method,Concentrated loads,Displacement singular element,Elasticity problem},
number = {December 2018},
pages = {195--205},
publisher = {Elsevier Ltd},
title = {{The boundary element method for elasticity problems with concentrated loads based on displacement singular elements}},
url = {https://doi.org/10.1016/j.enganabound.2018.11.016},
volume = {99},
year = {2019}
}
@article{Jamshidi2019,
abstract = {An improved meshfree radial point interpolation method (RPIM) is formulated for quasi-static and dynamic analyses of 2D inhomogeneous viscoelastic solids. The presented improved RPIM is formulated in time domain, in which, there is no need for the viscoelastic material to obey the correspondence principle and therefore, all kinds of inhomogeneous viscoelastic materials can be analyzed by the method. The domain integrals, appeared in the proposed RPIM, are computed by the Cartesian transformation method (CTM), which is a truly meshfree integration technique. In the implementation of the CTM no background mesh is required and the domain integrals are computed accurately and efficiently. The accuracy of the method is studied by presenting several numerical examples. The results are compared with available analytic or numerical solutions and very good agreement is observed in all cases.},
author = {Jamshidi, B. and Hematiyan, M. R. and Mahzoon, M.},
doi = {10.1016/j.enganabound.2019.04.031},
file = {:Users/takshingchan/Desktop/papers/wetting on elastic surface/BEM/viscoelastic/1-s2.0-S0955799718304983-main.pdf:pdf},
issn = {09557997},
journal = {Engineering Analysis with Boundary Elements},
keywords = {Correspondence principle,Functionally graded material,Mesh free radial point interpolation method,Time domain,Viscoelastic},
number = {April},
pages = {59--67},
publisher = {Elsevier Ltd},
title = {{An improved time domain meshfree method for analysis of quasi-static and dynamic inhomogeneous viscoelastic problems}},
url = {https://doi.org/10.1016/j.enganabound.2019.04.031},
volume = {106},
year = {2019}
}
@article{Khayat1998,
abstract = {A boundary element formulation is presented for the general two-dimensional simulation of confined two-phase incompressible flow of viscoelastic fluids. A boundary-only formulation is implemented for fluids obeying the Oldroyd-B constitutive equation. Similarly to the formulation in Part I for Newtonian fluids [Khayat et al. Engng Anal Boundary Elements 1997;19:279], the method requires the solution of two simultaneous integral equations on the interface between the two fluids and the confining solid boundary. Although the problem is formulated for any confining geometry, the method is illustrated for a deforming drop as it is driven by the ambient flow inside a convergent channel. The accuracy and convergence of the method are assessed by comparison with the analytical solution for two-phase Taylor-Couette flow, leading to excellent agreement. Further assessment is made by varying the time increment and mesh size of the discretized boundary for a drop deforming in a convergent channel. The influence of fluid elasticity is examined when one or both fluids are viscoelastic. {\textcopyright} 1998 Published by Elsevier Science Ltd. All rights reserved.},
author = {Khayat, Roger E.},
doi = {10.1016/s0955-7997(98)00056-3},
file = {:Users/takshingchan/Desktop/papers/wetting on elastic surface/BEM/viscoelastic/1-s2.0-S0955799798000563-main.pdf:pdf},
issn = {09557997},
journal = {Engineering Analysis with Boundary Elements},
keywords = {Boundary element analysis,Linear viscoelastic fluid,Planar drop deformation},
number = {4},
pages = {291--306},
title = {{Boundary element analysis of planar drop deformation in confined flow. Part II. Viscoelastic fluids}},
volume = {22},
year = {1998}
}
@article{Kusama1982,
abstract = {This paper analyses linear viscoelastic problems using the boundary element method together with the numerical inversion of the Laplace transform. This method reduces the amount of manual and computing time as compared with the finite element method. Two numerical examples are included to demonstrate the validity and accuracy of the method. {\textcopyright} 1982 Butterworth & Co. (Publishers) Ltd.},
author = {Kusama, Takashi and Mitsui, Yasushi},
doi = {10.1016/S0307-904X(82)80036-X},
file = {:Users/takshingchan/Desktop/papers/wetting on elastic surface/BEM/viscoelastic/1982_1-s2.0-S0307904X8280036X-main.pdf:pdf},
issn = {0307904X},
journal = {Applied Mathematical Modelling},
keywords = {boundary element method,linear viscoelastic analysis},
number = {4},
pages = {285--290},
title = {{Boundary element method applied to linear viscoelastic analysis}},
volume = {6},
year = {1982}
}
@article{Schanz1997,
abstract = {The usual time domain Boundary Element Method (BEM) contains fundamental solutions which are convoluted with time-dependent boundary data and integrated over the boundary surface. If the fundamental solution is known, e.g., in Elastodynamics, the temporal convolution can be performed analytically when the boundary data are approximated by polynomial shape functions in time and in the boundary elements. This formulation is well known, but the resulting time-stepping BEM procedure produces instabilities and high numerical damping, when the time step size is chosen too small and too large, respectively. Moreover, in case of viscoelastic or poroelastic domains, the fundamental solution is known only in the frequency domain such that the time history of a response can only be obtained by an inverse transformation of the frequency domain results. Here, a new approach for the evaluation of the convolution integrals, the so-called "Operational Quadrature Methods" developed by LUBICH, is presented. In this formulation, the convolution integral is numerically approximated by a quadrature formula whose weights are determined by the Laplace transform of the fundamental solution and a linear multistep method. Hence, the frequency domain fundamental solution can be used without the need of an inverse transformation. Therefore, the extension to viscoelastic problems succeeds using the elastic-viscoelastic correspondence principle.},
author = {Schanz, M. and Antes, H.},
doi = {10.1007/s004660050265},
file = {:Users/takshingchan/Desktop/papers/wetting on elastic surface/BEM/viscoelastic/A_new_visco-_and_elastodynamic_time_domain_Boundar.pdf:pdf},
issn = {01787675},
journal = {Computational Mechanics},
number = {5},
pages = {452--459},
title = {{A new visco- and elastodynamic time domain boundary element formulation}},
volume = {20},
year = {1997}
}
@article{Ashrafi2009,
abstract = {Structural analysis of viscoelastic solid polymers is one of the most important subjects in engineering structures. Several attempts have been so far made for the integral equation approach to viscoelastic problems. From the basic assumptions of viscoelastic constitutive equations and weighted residual techniques, a simple but effective boundary element formulation (BEF) is implemented for the standard linear solid (SLS) viscoelastic models. The SLS model provides an approximate representation of the observed behavior of a real polymer in its viscoelastic range. This formulation needs only Kelvin's fundamental solution of isotropic elastostatics with material constants prescribed as explicit functions of time. This approach avoids the use of relaxation functions and mathematical transformations, and it is able to solve the quasistatic viscoelastic problems with any load time-dependence and boundary conditions. As an application, a numerical example is provided to validate the proposed formulation. The problem of the pressurization of thick-walled cylindrical viscoelastic tanks made of PMMA polymer is completely analyzed by this approach. {\textcopyright} 2009 Springer Science+Business Media, Inc.},
author = {Ashrafi, H. and Farid, M.},
doi = {10.1007/s10598-009-9046-x},
file = {:Users/takshingchan/Desktop/papers/wetting on elastic surface/BEM/viscoelastic/Ashrafi-Farid2009_Article_AMathematicalBoundaryIntegralE.pdf:pdf},
issn = {1046283X},
journal = {Computational Mathematics and Modeling},
number = {4},
pages = {397--415},
title = {{A mathematical boundary integral equation analysis of standard viscoelastic solid polymers}},
volume = {20},
year = {2009}
}
@article{Khayat2000,
abstract = {An adaptive (Lagrangian) boundary element approach is proposed for the general three-dimensional drop deformation in confined flow. The adaptive method is stable as it includes remeshing capabilities of the deforming interface between drop and suspending fluid, and thus can handle large deformations. Both drop and surrounding fluid are viscous incompressible and can be Newtonian or viscoelastic. A boundary-only formulation is implemented for fluids obeying the linear Jeffrey's constitutive equation. Similarly to the formulation for two-dimensional Newtonian fluids (Khayat RE, Luciani A, Utracki LA. Boundary element analysis of planar drop deformation in confined flow. Part I. Newtonian fluids. Engineering Analysis of Boundary Elements 1997; 19: 279), the method requires the solution of two simultaneous integral equations on the interface between the two fluids and the confining solid boundary. Although the problem is formulated for any confining geometry, the method is illustrated for a deforming drop as it is driven by the ambient flow inside a cylindrical tube. The accuracy of the method is assessed by comparison with the analytical solution for two-phase radial spherical flow, leading to good agreement. The influence of mesh refinement is examined for a drop in simple shear flow. Copyright (C) 2000 John Wiley and Sons, Ltd.},
author = {Khayat, Roger E.},
doi = {10.1002/1097-0363(20001015)34:3<241::AID-FLD57>3.0.CO;2-1},
file = {:Users/takshingchan/Desktop/papers/wetting on elastic surface/BEM/viscoelastic/Drop_1097-0363(20001015)34_3_241__AID-FLD57_3.0.CO\;2-1 (1).pdf:pdf},
issn = {02712091},
journal = {International Journal for Numerical Methods in Fluids},
keywords = {3D,Boundary element,Drop deformation,Viscoelastic systems},
number = {3},
pages = {241--275},
title = {{Three-dimensional boundary element analysis of drop deformation in confined flow for Newtonian and viscoelastic systems}},
volume = {34},
year = {2000}
}
@article{Zhu2011,
abstract = {A fast multipole formulation for 2D linear viscoelastic problems is presented in this paper by incorporating the elasticviscoelastic correspondence principle. Systems of multipole expansion equations are formed and solved analytically in Laplace transform domain. Three commonly used viscoelastic models are introduced to characterize the time-dependent behavior of the materials. Since the transformed multipole formulations are identical to those for the 2D elastic problems, it is quite easy to implement the 2D viscoelastic fast multipole boundary element method. Besides, all the integrals are evaluated analytically, leading to highly accurate results and fast convergence of the numerical scheme. Several numerical examples, including planar viscoelastic composites with single inclusion or randomly distributed multi-inclusions, as well as the problem of a crack in a pressured viscoelastic plane, are presented. The results are verified by comparison with the developed analytical solutions to illustrate the accuracy and efficiency of the approach. {\textcopyright} 2010 Elsevier Ltd.},
author = {Zhu, X. Y. and Chen, W. Q. and Huang, Z. Y. and Liu, Y. J.},
doi = {10.1016/j.enganabound.2010.05.018},
file = {:Users/takshingchan/Desktop/papers/wetting on elastic surface/BEM/viscoelastic/Fast2DBEM_viscoelastic1-s2.0-S0955799710001980-main.pdf:pdf},
issn = {09557997},
journal = {Engineering Analysis with Boundary Elements},
keywords = {Boundary element method,Fast multipole method,Multi-inclusion composite,Viscoelasticity},
number = {2},
pages = {170--178},
publisher = {Elsevier},
title = {{A fast multipole boundary element method for 2D viscoelastic problems}},
url = {http://dx.doi.org/10.1016/j.enganabound.2010.05.018},
volume = {35},
year = {2011}
}

@article{Oliveira2017,
abstract = {The present study aims at performing a mechanical analysis of 2D viscoelastic cracked structural materials using the Boundary Element Method (BEM). The mesh dimensionality reduction provided by the BEM and its accuracy in representing high gradient fields make this numerical method robust to solve fracture mechanics problems. Viscoelastic models address phenomena that provide changes on the mechanical material properties along time. Well-established viscoelastic models such as Maxwell, Kelvin–Voigt and Boltzmann are used in this study. The numerical viscoelastic scheme, which is based on algebraic BEM equations, utilizes the Euler method for time derivative evaluation. Therefore, the unknown variables at the structural boundary and its variations along time are determined through an ordinary linear system of equations. Moreover, time-dependent boundary conditions may be considered, which represent loading phases. The dual BEM formulation is adopted for modelling the mechanical structural behaviour of cracks bodies. Three examples are considered to illustrate the robustness of the adopted formulation. The results achieved by the BEM are in good agreement with reported data and numerical stability is observed.},
author = {Oliveira, Hugo Luiz and Leonel, Edson Denner},
doi = {10.1007/s40091-016-0144-7},
file = {:Users/takshingchan/Desktop/papers/wetting on elastic surface/BEM/viscoelastic/Oliveira-Leonel2017_Article_ABEMFormulationAppliedInTheMec.pdf:pdf},
isbn = {4009101601},
issn = {20086695},
journal = {International Journal of Advanced Structural Engineering},
keywords = {Boundary element method,Fracture mechanics,Nonhomogeneous media,Viscoelasticity},
number = {1},
pages = {1--12},
publisher = {Springer Berlin Heidelberg},
title = {{A BEM formulation applied in the mechanical material modelling of viscoelastic cracked structures}},
volume = {9},
year = {2017}
}
@article{Lee1994,
abstract = {This paper presents an efficient method for the computation of the fundamental solutions in time-domain boundary integral equation for viscoelastic problems. The method proposed is based on the Laplace transform and the correspondence principle. The relaxation function is expanded in a sum of exponentials and the transformed fundamental solutions are inverted numerically into real time space. The proposed procedure requires a small computational effort and it is applicable in time-domain boundary element analysis of realistic viscoelastic problems. Numerical results of an example problem show the effectiveness and applicability of the proposed method. {\textcopyright} 1994.},
author = {Lee, Sang S. and Sohn, Yong S. and Park, Sung H.},
doi = {10.1016/0955-7997(94)90046-9},
file = {:Users/takshingchan/Desktop/papers/wetting on elastic surface/BEM/viscoelastic/On fundamental solutions in time-domain boundary element analysis of linear viscoelasticity.pdf:pdf},
issn = {09557997},
journal = {Engineering Analysis with Boundary Elements},
keywords = {Laplace transform,Time-domain boundary element analysis,correspondence principle,fundamental solutions,viscoelasticity},
number = {3},
pages = {211--217},
title = {{On fundamental solutions in time-domain boundary element analysis of linear viscoelasticity}},
volume = {13},
year = {1994}
}
@article{Press1993,
abstract = {In this paper, Boundary Element Method (BEM) is exploited for the numerical solution of interior acoustics problems governed by the Helmholtz's equation. A detailed literature survey on the application of the BEM to the radiation problems concerning the interior regions is presented. A formulation directed to the particular application of noise generation inside motor vehicle passenger compartments is developed. The solution of the problem is illustrated, in detail, on a classical acoustic problem, i.e. the acoustic response of a spherical cavity. The sound pressure variation along the radius is examined as a function of the dimensionless frequency number. The effect of an opening on the surface of the body is also examined},
author = {Press, W I T and Press, W I T},
file = {:Users/takshingchan/Desktop/papers/wetting on elastic surface/BEM/viscoelastic/TimeDomain_1993_BEMBE93005FU2.pdf:pdf},
journal = {Simulation},
pages = {11--21},
title = {{Transactions on Modelling and Simulation vol 6, {\textcopyright} 1993 WIT Press, www.witpress.com, ISSN 1743-355X}},
volume = {6},
year = {1993}
}

@article{Wang2007,
abstract = {A time domain boundary element method (BEM) is presented to model the quasi-static linear viscoelastic behavior of asphalt pavements. In the viscoelastic analysis, the fundamental solution is derived in terms of elemental displacement discontinuities (DDs) and a boundary integral equation is formulated in the time domain. The unknown DDs are assumed to vary quadratically in the spatial domain and to vary linearly in the time domain. The equation is then solved incrementally through the whole time history using an explicit time-marching approach. All the spatial and temporal integrations can be performed analytically, which guarantees the accuracy of the method and the stability of the numerical procedure. Several viscoelastic models such as Boltzmann, Burgers, and power-law models are considered to characterize the time-dependent behavior of linear viscoelastic materials. The numerical method is applied to study the load-induced stress redistribution and its effects on the cracking performance of asphalt pavements. Some benchmark problems are solved to verify the accuracy and efficiency of the approach. Numerical experiments are also carried out to demonstrate application of the method in pavement engineering. {\textcopyright} 2006 Elsevier Ltd. All rights reserved.},
author = {Wang, Jianlin and Birgisson, Bjorn},
doi = {10.1016/j.enganabound.2006.09.007},
file = {:Users/takshingchan/Desktop/papers/wetting on elastic surface/BEM/viscoelastic/TimeDomain_BEM1-s2.0-S0955799706001718-main.pdf:pdf},
issn = {09557997},
journal = {Engineering Analysis with Boundary Elements},
keywords = {Asphalt pavements,Displacement discontinuities,Stress redistribution,Time domain BEM,Time marching,Viscoelastic models,Viscoelasticity},
number = {3},
pages = {226--240},
title = {{A time domain boundary element method for modeling the quasi-static viscoelastic behavior of asphalt pavements}},
volume = {31},
year = {2007}
}
@article{Schanz1999,
abstract = {Viscoelastic solids may be effectively treated by the boundary element method (BEM) in the Laplace domain. However, calculation of transient response via the Laplace domain requires the inverse transform. Since all numerical inversion formulas depend heavily on a proper choice of their parameters, a direct evaluation in the time domain seems to be preferable. On the other hand, direct calculation of viscoelastic solids in the time domain requires the knowledge of viscoelastic fundamental solutions. Such solutions are simply obtained in the Laplace domain with the elastic-viscoelastic correspondence principle, but not in the time domain. Due to this, a quadrature rule for convolution integrals, the 'convolution quadrature method' proposed by Lubich, is applied. This numerical quadrature formula determines their integration weights from the Laplace transformed fundamental solution and a linear multistep method. Finally, a boundary element formulation in the time domain using all the advantages of the Laplace domain formulation is obtained. Even materials with complex Poisson ratio, leading to time-dependent integral free terms in the boundary integral equation, can be treated by this formulation. Two numerical examples, a 3D rod and an elastic concrete slab resting on a viscoelastic half-space, are presented in order to assess the accuracy and the parameter choice of the proposed method. Copyright {\textcopyright} 1999 John Wiley & Sons, Ltd.},
author = {Schanz, Martin},
doi = {10.1002/(sici)1099-0887(199911)15:11<799::aid-cnm294>3.0.co;2-f},
file = {:Users/takshingchan/Desktop/papers/wetting on elastic surface/BEM/viscoelastic/TimeDomain_cnme99AM (1).pdf:pdf},
issn = {10698299},
journal = {Communications in Numerical Methods in Engineering},
keywords = {Boundary integral equations,Time domain,Transform methods,Viscoelasticity},
number = {11},
pages = {799--809},
title = {{A boundary element formulation in time domain for viscoelastic solids}},
volume = {15},
year = {1999}
}

@article{Rizzo1971,
abstract = {A numerical solution procedure is given for plane boundary value problems of linear viscoelasticity theory, based on Kelvin's point force solution to the field equations of elasticity theory. Conditions for applicability of the correspondence principle are assumed; otherwise rather general material properties, domain shapes, and boundary conditions are considered. Systems of singular integral equations are formed and solved numerically in the Laplace transform space. Transform inversion is considered separately. Data for a familiar problem of an elastically reinforced viscoelastic cylinder are given for illustration. The procedure may be extended to include anisotropic viscoelastic behavior; also it is not inherently limited to plane problems.},
author = {Rizzo, F. J. and Shippy, D. J.},
doi = {10.1137/0121034},
file = {:Users/takshingchan/Desktop/papers/wetting on elastic surface/BEM/viscoelastic/viscoelastic_Rizzo.pdf:pdf},
issn = {0036-1399},
journal = {SIAM Journal on Applied Mathematics},
number = {2},
pages = {321--330},
title = {{An Application of the Correspondence Principle of Linear Viscoelasticity Theory}},
volume = {21},
year = {1971}
}
@article{Panagiotopoulos2014,
abstract = {A simple yet efficient procedure to solve quasistatic problems of special linear visco-elastic solids at small strains with equal rheological response in all tensorial components, utilizing boundary element method (BEM), is introduced. This procedure is based on the implicit discretisation in time (the so-called Rothe method) combined with a simple "algebraic" transformation of variables, leading to a numerically stable procedure (proved explicitly by discrete energy estimates), which can be easily implemented in a BEM code to solve initial-boundary value visco-elastic problems by using the Kelvin elastostatic fundamental solution only. It is worth mentioning that no inverse Laplace transform is required here. The formulation is straightforward for both 2D and 3D problems involving unilateral frictionless contact. Although the focus is to the simplest Kelvin-Voigt rheology, a generalization to Maxwell, Boltzmann, Jeffreys, and Burgers rheologies is proposed, discussed, and implemented in the BEM code too. A few 2D and 3D initial-boundary value problems, one of them with unilateral frictionless contact, are solved numerically. {\textcopyright} 2014 Elsevier Ltd. All rights reserved.},
author = {Panagiotopoulos, C. G. and Manti{\v{c}}, V. and Roub{\'{i}}{\v{c}}ek, T.},
doi = {10.1016/j.ijsolstr.2014.02.028},
file = {:Users/takshingchan/Desktop/papers/wetting on elastic surface/BEM/viscoelastic/viscoelasticBEM1-s2.0-S0020768314000766-main.pdf:pdf},
issn = {00207683},
journal = {International Journal of Solids and Structures},
keywords = {Boundary element method,Burgers rheology,Implicit time discretisation,Jeffreys rheology,Kelvin-Voigt rheology,Maxwell rheology,Quasistatic linear visco-elasticity,Standard linear solids,Unilateral contact},
number = {13},
pages = {2261--2271},
title = {{A simple and efficient BEM implementation of quasistatic linear visco-elasticity}},
volume = {51},
year = {2014}
}
@article{Shanahan1987,
abstract = {At a triple wetting line, the liquid-fluid tension may produce a wetting ridge in sufficiently soft solids. By employing variational methods, it has been shown that the solid strain combined with the Laplace pressure may modify contact angle equilibrium on a mesoscopic scale, situated between that of the molecular structure of the triple line and the macroscopic behavior observed in quotidian contact angle assessment. Young's equation remains perfectly valid in the latter regime. Some possible consequences are discussed.},
author = {Shanahan, M. E.R.},
doi = {10.1088/0022-3727/20/7/018},
file = {:Users/takshingchan/Desktop/papers/wetting on elastic surface/ridge/M_E_R_Shanahan_1987_J._Phys._D%3A_Appl._Phys._20_945.pdf:pdf},
issn = {00223727},
journal = {Journal of Physics D: Applied Physics},
number = {7},
pages = {945--950},
title = {{The influence of solid micro-deformation on contact angle equilibrium}},
volume = {20},
year = {1987}
}
@article{Das2011,
abstract = {A sessile liquid drop can deform the substrate on which it rests if the solid is sufficiently "soft." In this paper we compute the detailed spatial structure of the capillary forces exerted by the drop on the solid substrate using a model based on Density Functional Theory. We show that, in addition to the normal forces, the drop exerts a previously unaccounted tangential force. The resultant effect on the solid is a pulling force near the contact line directed towards the interior of the drop, i.e., not along the interface. The resulting elastic deformations of the solid are worked out and illustrate the importance of the tangential forces. {\textcopyright} 2011 American Institute of Physics.},
archivePrefix = {arXiv},
arxivId = {1103.0782},
author = {Das, Siddhartha and Marchand, Antonin and Andreotti, Bruno and Snoeijer, Jacco H.},
doi = {10.1063/1.3615640},
eprint = {1103.0782},
file = {:Users/takshingchan/Desktop/papers/wetting on elastic surface/Jacco/1.3615640 (1).pdf:pdf},
issn = {10706631},
journal = {Physics of Fluids},
number = {7},
title = {{Elastic deformation due to tangential capillary forces}},
volume = {23},
year = {2011}
}
@article{Andreotti2020,
abstract = {The laws of wetting are well known for drops on rigid surfaces but change dramatically when the substrate is soft and deformable. The combination of wetting and the intricacies of soft polymeric interfaces have provided many rich examples of fluid-structure interactions, both in terms of phenomenology and from a fundamental perspective. In this review we discuss experimental and theoretical progress on the statics and dynamics of soft wetting. In this context we critically revisit the foundations of capillarity, such as the nature of solid surface tension, the microscopic mechanics near the contact line, and the dissipative mechanisms that lead to unexpected spreading dynamics.},
author = {Andreotti, Bruno and Snoeijer, Jacco H.},
doi = {10.1146/annurev-fluid-010719-060147},
file = {:Users/takshingchan/Desktop/papers/wetting on elastic surface/Jacco/annurev-fluid-010719-060147.pdf:pdf},
issn = {00664189},
journal = {Annual Review of Fluid Mechanics},
keywords = {contact angles,elasticity,elastocapillarity,gels,wetting and spreading},
pages = {285--308},
title = {{Statics and Dynamics of Soft Wetting}},
volume = {52},
year = {2020}
}
@article{Andreotti2016,
abstract = {Extremely compliant elastic materials, such as thin membranes or soft gels, can be deformed when wetted by a liquid drop. It is commonly assumed that the solid capillarity in "soft wetting" can be treated in the same manner as liquid surface tension. However, the physical chemistry of a solid interface is itself affected by any distortion with respect to the elastic reference state. This gives rise to phenomena that have no counterpart in liquids: the mechanical surface stress is different from the excess free energy in surface. Here we point out some striking consequences of this "Shuttleworth effect" in the context of wetting on deformable substrates, such as the appearance of elastic singularities and unconventional capillary forces. We provide a synthesis between different viewpoints on soft wetting (microscopic and macroscopic, mechanics and thermodynamics), and point out key open issues in the field.},
archivePrefix = {arXiv},
arxivId = {1909.00463},
author = {Andreotti, Bruno and Snoeijer, Jacco H.},
doi = {10.1209/0295-5075/113/66001},
eprint = {1909.00463},
file = {:Users/takshingchan/Desktop/papers/wetting on elastic surface/Jacco/jaccoreview.pdf:pdf},
issn = {12864854},
journal = {Epl},
number = {6},
title = {{Soft wetting and the Shuttleworth effect, at the crossroads between thermodynamics and mechanics}},
volume = {113},
year = {2016}
}
@article{Karpitschka2015,
abstract = {Liquid drops on soft solids generate strong deformations below the contact line, resulting from a balance of capillary and elastic forces. The movement of these drops may cause strong, potentially singular dissipation in the soft solid. Here we show that a drop on a soft substrate moves by surfing a ridge: the initially flat solid surface is deformed into a sharp ridge whose orientation angle depends on the contact line velocity. We measure this angle for water on a silicone gel and develop a theory based on the substrate rheology. We quantitatively recover the dynamic contact angle and provide a mechanism for stick-slip motion when a drop is forced strongly: the contact line depins and slides down the wetting ridge, forming a new one after a transient. We anticipate that our theory will have implications in problems such as self-organization of cell tissues or the design of capillarity-based microrheometers.},
archivePrefix = {arXiv},
arxivId = {1406.5547},
author = {Karpitschka, S. and Das, S. and {Van Gorcum}, M. and Perrin, H. and Andreotti, B. and Snoeijer, J. H.},
doi = {10.1038/ncomms8891},
eprint = {1406.5547},
file = {:Users/takshingchan/Desktop/papers/wetting on elastic surface/Jacco/ncomms8891 (1).pdf:pdf},
issn = {20411723},
journal = {Nature Communications},
pages = {1--7},
publisher = {Nature Publishing Group},
title = {{Droplets move over viscoelastic substrates by surfing a ridge}},
volume = {6},
year = {2015}
}
@article{Snoeijer2018,
abstract = {The interfacial mechanics of soft elastic networks plays a central role in biological and technological contexts. Yet, effects of solid capillarity have remained controversial, primarily due to the strain-dependent surface energy. Here we derive the equations that govern the selection of contact angles of liquid drops on elastic surfaces from variational principles. It is found that the substrate's elasticity imposes a nontrivial condition that relates pinning, hysteresis, and contact line mobility to the so-called Shuttleworth effect. We experimentally validate our theory for droplets on a silicone gel, revealing an enhanced contact line mobility when stretching the substrate.},
archivePrefix = {arXiv},
arxivId = {1803.04428},
author = {Snoeijer, Jacco H. and Rolley, Etienne and Andreotti, Bruno},
doi = {10.1103/PhysRevLett.121.068003},
eprint = {1803.04428},
file = {:Users/takshingchan/Desktop/papers/wetting on elastic surface/Jacco/PhysRevLett.121.068003.pdf:pdf},
issn = {10797114},
journal = {Physical Review Letters},
keywords = {doi:10.1103/PhysRevLett.121.068003 url:https://doi.org/10.1103/PhysRevLett.121.068003},
number = {6},
pages = {68003},
pmid = {30141666},
publisher = {American Physical Society},
title = {{Paradox of Contact Angle Selection on Stretched Soft Solids}},
url = {https://doi.org/10.1103/PhysRevLett.121.068003},
volume = {121},
year = {2018}
}
@article{Snoeijer2020,
abstract = {Soft materials that are subjected to large deformations exhibit an extremely rich phenomenology, with properties lying in between those of simple fluids and those of elastic solids. In the continuum description of these systems, one typically follows either the route of solid mechanics (Lagrangian description) or the route of fluid mechanics (Eulerian description). The purpose of this review is to highlight the relationship between the theories of viscoelasticity and of elasticity, and to leverage this connection in contemporary soft matter problems. We review the principles governing models for viscoelastic liquids, for example solutions of flexible polymers. Such materials are characterized by a relaxation time $\lambda$, over which stresses relax. We recall the kinematics and elastic response of large deformations, and show which polymer models do (and which do not) correspond to a nonlinear elastic solid in the limit $\lambda$ → ∞. With this insight, we split the work done by elastic stresses into reversible and dissipative parts, and establish the general form of the conservation law for the total energy. The elastic correspondence can offer an insightful tool for a broad class of problems; as an illustration, we show how the presence or absence of an elastic limit determines the fate of an elastic thread during capillary instability.},
author = {Snoeijer, J. H. and Pandey, A. and Herrada, M. A. and Eggers, J.},
doi = {10.1098/rspa.2020.0419},
file = {:Users/takshingchan/Desktop/papers/wetting on elastic surface/Jacco/rspa.2020.0419ViscoelasticVsElastic.pdf:pdf},
issn = {14712946},
journal = {Proceedings of the Royal Society A: Mathematical, Physical and Engineering Sciences},
keywords = {capillarity,elasticity,gels,instability,viscoelasticity},
number = {2243},
title = {{The relationship between viscoelasticity and elasticity: Viscoelasticity and elasticity}},
volume = {476},
year = {2020}
}
@article{VanGorcum2018,
abstract = {The contact line of a liquid drop on a solid exerts a nanometrically sharp surface traction. This provides an unprecedented tool to study highly localized and dynamic surface deformations of soft polymer networks. One of the outstanding problems in this context is the stick-slip instability, observed above a critical velocity, during which the contact line periodically depins from its own wetting ridge. Time-resolved measurements of the solid deformation are challenging, and the mechanism of dynamical depinning has remained elusive. Here we present direct visualisations of the dynamic wetting ridge formed by water spreading on a PDMS gel. Unexpectedly, it is found that the opening angle of the wetting ridge increases with speed, which cannot be attributed to bulk rheology, but points to a dynamical increase of the solid's surface tensions. From this we derive the criterion for depinning that is confirmed experimentally. Our findings reveal a deep connection between stick-slip processes and newly identified dynamical surface effects.},
archivePrefix = {arXiv},
arxivId = {1807.07740},
author = {{Van Gorcum}, M. and Andreotti, B. and Snoeijer, J. H. and Karpitschka, S.},
doi = {10.1103/PhysRevLett.121.208003},
eprint = {1807.07740},
file = {:Users/takshingchan/Desktop/papers/wetting on elastic surface/Jacco/vanGorcumPRL2018-2.pdf:pdf},
issn = {10797114},
journal = {Physical Review Letters},
keywords = {doi:10.1103/PhysRevLett.121.208003 url:https://doi.org/10.1103/PhysRevLett.121.208003},
number = {20},
pages = {208003},
pmid = {30500225},
publisher = {American Physical Society},
title = {{Dynamic Solid Surface Tension Causes Droplet Pinning and Depinning}},
url = {https://doi.org/10.1103/PhysRevLett.121.208003},
volume = {121},
year = {2018}
}
@article{Limat2012,
abstract = {The deformation of a soft substrate by a straight contact line is calculated, and the result applied to a static rivulet between two parallel contact lines. The substrate is supposed to be incompressible (Stokes-like description of elasticity), and having a non-zero surface tension, that eventually differs depending on whether its surface is dry or wet. For a single straight line separating two domains with the same substrate surface tension, the ridge profile is shown to be very close to that of Shanahan and de Gennes, but shifts from the contact line of a distance equal to the elastocapillary length built upon substrate surface tension and shear modulus. As a result, the divergence near contact line disappears and is replaced by a balance of surface tensions at the contact line (Neumann equilibrium), though the profile remains nearly logarithmic. In the rivulet case, using the previous solution as a Green function allows one to calculate analytically the geometry of the distorted substrate, and in particular its slope on each side (wet and dry) of the contact lines. These two slopes are shown to be nearly proportional to the inverse of substrate surface tensions, though the respective weight of each side (wet and dry) in the final expressions is difficult to establish because of the linear nature of standard elasticity. A simple argument combining Neumann and Young equations is however provided to overcome this limitation. The result may have surprising implications for the modelling of hysteresis on systems having both plastic and elastic properties, as initiated long ago by Extrand and Kumagai.},
author = {Limat, Laurent},
doi = {10.1140/epje/i2012-12134-6},
file = {:Users/takshingchan/Desktop/papers/wetting on elastic surface/Limat/Limat2012_Article_StraightContactLinesOnASoftInc.pdf:pdf},
issn = {1292-8941},
journal = {The European Physical Journal E},
number = {12},
pages = {1--13},
title = {{Straight contact lines on a soft, incompressible solid}},
volume = {35},
year = {2012}
}
@article{Long1996,
abstract = {We model the statics and dynamics of wetting of liquids on thin rubber films. We show that at equilibrium the capillary forces deform soft substrates, leading to undulations of the rubber film surface originating at the triple line. Such deformations propagate when a liquid spreads on the rubber film. This induces the dissipation that may control the spreading dynamics. We derive a general expression for this dissipation as a function of the viscoelastic properties of the substrate. We calculate the spreading velocities for various mechanical relaxation models. Using available mechanical relaxation data, we find that our model may well account for the experimental observations of Carr{\'{e}} and Shanahan, who demonstrated the importance of viscoelastic braking effects.},
author = {Long, Didier and Ajdari, Armand and Leibler, Ludwik},
doi = {10.1021/la9604700},
file = {:Users/takshingchan/Desktop/papers/wetting on elastic surface/Long/la9604700.pdf:pdf},
issn = {07437463},
journal = {Langmuir},
number = {21},
pages = {5221--5230},
title = {{Static and dynamic wetting properties of thin rubber films}},
volume = {12},
year = {1996}
}
@article{Fernandez-Toledano2017,
abstract = {Using large-scale molecular dynamics simulations, we model a 9.2 nm liquid bridge between two solid plates having a regular hexagonal lattice and analyse the forces acting at the various interfaces for a range of liquid-solid interactions. Our objective is to study the mechanical equilibrium of the system, especially that at the three-phase contact line. We confirm previous MD studies that have shown that the internal pressure inside the liquid is given precisely by the Laplace contribution and that the solid exerts a global force at the contact line in agreement with Young's equation, validating it down to the nanometre scale, which we quantify. In addition, we confirm that the force exerted by the liquid on the solid has the expected normal component equal to $\gamma$lv sin $\theta$0, where $\gamma$lv is the surface tension of the liquid and $\theta$0 is the equilibrium contact angle measured on the scale of the meniscus. Recent thermodynamic arguments predict that the tangential force exerted by the liquid on the solid should be equal to the work of adhesion expressed as Wa0 = $\gamma$lv(1 + cos $\theta$0). However, we find that this is true only when any layering of the liquid molecules close to liquid-solid interface is negligible. The force significantly exceeds this value when strong layering is present.},
author = {Fernandez-Toledano, J. C. and Blake, T. D. and Lambert, P. and {De Coninck}, J.},
doi = {10.1016/j.cis.2017.03.006},
file = {:Users/takshingchan/Desktop/papers/wetting on elastic surface/AboutForceAtCL/1-s2.0-S0001868616303244-main (1).pdf:pdf},
issn = {00018686},
journal = {Advances in Colloid and Interface Science},
keywords = {Adhesion,Liquid-solid interface,Molecular-dynamics,Three-phase contact zone,Wetting},
pages = {102--107},
pmid = {28457500},
publisher = {Elsevier B.V.},
title = {{On the cohesion of fluids and their adhesion to solids: Young's equation at the atomic scale}},
url = {http://dx.doi.org/10.1016/j.cis.2017.03.006},
volume = {245},
year = {2017}
}
@article{Fan2021,
abstract = {We investigate the capillary force balance at the contact line on rough solid surfaces and in two-liquid systems. Our results confirm that solid-liquid interactions perpendicular to the interface have a significant influence on the lateral component of the capillary force exerted on the contact line. Surface roughness of the solid substrate reduces the mobility of liquid and alters how the perpendicular solid-liquid interactions transfer into a force acting parallel to the interface. A quantitative relation between surface roughness and the transfer strategy is proposed. Moreover, when a liquid is in coexistence with another immiscible liquid on a solid, the capillary forces exerted on liquids of both sides are involved in our theoretical model. The contact angle can be predicted by calculating three interfacial tensions. These arguments are then verified by molecular dynamics simulations. Our findings set up the generalized theoretical framework for the capillary force balance at the contact line and broaden its application in more realistic scenarios.},
author = {Fan, Jing Cun and {De Coninck}, Jo{\"{e}}l and Wu, Heng An and Wang, Feng Chao},
doi = {10.1016/j.jcis.2020.11.100},
file = {:Users/takshingchan/Desktop/papers/wetting on elastic surface/MD_simulations/1-s2.0-S0021979720316192-main.pdf:pdf},
issn = {10957103},
journal = {Journal of Colloid and Interface Science},
keywords = {Capillary force,Contact angle,Contact line,Molecular dynamics simulations,Roughness,Surface tension,Wetting,Young's equation},
pages = {320--327},
pmid = {33302048},
publisher = {Elsevier Inc.},
title = {{A generalized examination of capillary force balance at contact line: On rough surfaces or in two-liquid systems}},
url = {https://doi.org/10.1016/j.jcis.2020.11.100},
volume = {585},
year = {2021}
}
@article{Liang2018a,
abstract = {Results of the coarse-grained molecular dynamics simulations are used to show that the force balance analysis at the triple-phase contact line formed at an elastic substrate has to include a quartet of forces: three surface tensions (surface free energies) and an elastic force per unit length. In the case of the contact line formed by a droplet on an elastic substrate an elastic force is due to substrate deformation generated by formation of the wetting ridge. The magnitude of this force fel is proportional to the product of the ridge height h and substrate shear modulus G. Similar elastic line force should be included in the force analysis at the triple-phase contact line of a solid particle in contact with an elastic substrate. For this contact problem elastic force obtained from contact angles and surface tensions is a sum of the elastic forces acting from the side of a solid particle and an elastic substrate. By considering only three line forces acting at the triple-phase contact line, one implicitly accounts the bulk stress contribution as a part of the resultant surface stresses. This "contamination" of the surface properties by a bulk contribution could lead to unphysically large values of the surface stresses in soft materials.},
author = {Liang, Heyi and Cao, Zhen and Wang, Zilu and Dobrynin, Andrey V.},
doi = {10.1021/acs.langmuir.8b01680},
file = {:Users/takshingchan/Desktop/papers/wetting on elastic surface/MD_simulations/acs.langmuir.8b01680 (1).pdf:pdf},
issn = {15205827},
journal = {Langmuir},
number = {25},
pages = {7497--7502},
pmid = {29847135},
title = {{Surface Stresses and a Force Balance at a Contact Line}},
volume = {34},
year = {2018}
}
@article{Liang2016,
abstract = {We use molecular dynamics simulations to study mechanical properties of polymeric nanocomposites of liquid inclusions in polymeric network matrix. The shear modulus of nanocomposite is shown to be a universal function of the elastocapillary number $\gamma$NL/(GNR0), where $\gamma$NL is the surface tension of the liquid/network interface, GN is the shear modulus of the network and R0 is the initial size of liquid inclusions. First, in the range of elastocapillary numbers, $\gamma$NL/(GNR0) < 1, the composite shear modulus increases with increasing elastocapillary number. In this interval of elastocapillary numbers, liquid inclusions soften the network such that the composite modulus GC is smaller than GN. However, for elastocapillary numbers $\gamma$NL/(GNR0) ≈ 2, the liquid inclusions begin to reinforce the network resulting in GC > GN. In such composites, the surface energy of the deformed liquid inclusions stiffens the composite. When the elastocapillary number increases further, $\gamma$NL/(GNR0) ≫ 1, the interfacial energy of network/liquid interface dominates the mechanical response of the composite. Elongation ratio of the liquid inclusions monotonically decreases with increasing elastocapillary number $\gamma$NL/(GNR0).},
author = {Liang, Heyi and Cao, Zhen and Dobrynin, Andrey V.},
doi = {10.1021/acs.macromol.6b01499},
file = {:Users/takshingchan/Desktop/papers/wetting on elastic surface/MD_simulations/acs.macromol.6b01499.pdf:pdf},
issn = {15205835},
journal = {Macromolecules},
number = {18},
pages = {7108--7115},
title = {{Molecular dynamics simulations of the effect of elastocapillarity on reinforcement of soft polymeric materials by liquid inclusions}},
volume = {49},
year = {2016}
}
@article{Kirkwood1949,
abstract = {A general statistical mechanical theory of interfacial phenomena is developed and expressions are derived relating the surface tension and other superficial thermodynamic functions to the potential of intermolecular force and molecular distribution functions. On the basis of a reasonable approximation to the superficial density of molecular pairs, the Lennard-Jones potential and the Eisenstein-Gingrich radial distribution function, the surface tension, surface energy, and the superficial density of matter, referred to the surface of tension, are calculated for liquid argon at 90°K and compared with experiment. The positive value which is obtained for the superficial density, referred to the surface of tension, confirms the results of Tolman's quasi-thermodynamic theory and leads to the conclusion the surface tension of small drops decreases with increasing curvature.},
author = {Kirkwood, John G. and Buff, Frank P.},
doi = {10.1063/1.1747248},
file = {:Users/takshingchan/Desktop/papers/wetting on elastic surface/MD_simulations/StatisticalCompSurfaceTension_for MD.pdf:pdf},
issn = {00219606},
journal = {The Journal of Chemical Physics},
number = {3},
pages = {338--343},
title = {{The statistical mechanical theory of surface tension}},
volume = {17},
year = {1949}
}
@article{MayssaraA.AboHassaninSupervised2014,
abstract = {Seiring dengan kemajuan ilmu pengetahuan dan teknologi yang menjadi pusat perhatian dunia. Maka manusia dituntut untuk menciptakan peralatan-peralatan canggih untuk teknologi muktahir. Baik itu dalam bidang bisnis, perdagangan, kesehatan, militer, pendidikan, komunikasi dan budaya maupun bidang-bidang lainnya. Maka teknologi ini membawa perubahan pada peralatan-peralatan yang dulunya bekerja secara analog mulai dikembangkan secara digital, dan bahkan yang bekerjanya secara manual sekarang banyak dikembangkan secara otomatis, seperti kamera digital, handycam, dan sebagainya, dalam pembacaan pengukuran juga sudah dikembangkan ke dalam teknik digital. Contohnya perangkat Load Cell. Dan keuntungan menggunakan Load Cell adalah untuk mempermudah dalam pembacaan data untuk meminimalkan kesalahan dalam pembacaan data yang disebabkan adanya human error.Pada pemilihan Load Cell bertujuan untuk memilih kecocokan dalam membuat rancang bangun alat uji tarik kapasitas 3 ton, dimana dalam pemilihan ini kami memilih jenis load cell “S” karna alat yang kita rancang adalah uji tarik bukan uji tekan. Dengan kapasitas load cell 5 ton. Untuk membuat jarak aman dalam pengujian specimen ST41. Load Cell menggunakan system perangkat elektronik pengolahan data yang menjadi sebuah kurva tegangan regangan. Data-data yang diperoleh tersebut berupa besarnya pembebanan hasil dari pengujian specimen ST41. Kata},
author = {{Mayssara A. Abo Hassanin Supervised}, Affiifi.},
file = {:Users/takshingchan/Desktop/papers/wetting on elastic surface/Others/MovingVerticalDroplets2108.12002.pdf:pdf},
journal = {Paper Knowledge . Toward a Media History of Documents},
title = {{済無No Title No Title No Title}},
year = {2014}
}
@article{Fredrickson1992,
abstract = {We report on an analysis of the free energy of distortion of a molten polymer brush, such as a layer of block copolymer at an air interface. Within the Alexander-de Gennes approximation of a delta function distribution of chain ends, but rigorously enforcing incompressibility, we calculate the change in the free energy of a brush associated with a small-amplitude sinusoidal displacement of the free surface about the equilibrium height. Unlike the surface of a liquid, long-wavelength modes in a brush are suppressed due to the lateral chain stretching required to maintain constant density. We demonstrate the existence of a preferred wavelength for the surface modes of a molten brush and estimate the fluctuation amplitude. The energy cost to deform a brush with a blunt object, e.g., the tip of an atomic force microscope, is also discussed. {\textcopyright} 1992, American Chemical Society. All rights reserved.},
author = {Fredrickson, Glenn H. and Ajdari, Armand and Leibler, Ludwik and Carton, Jean Pierre},
doi = {10.1021/ma00037a015},
file = {:Users/takshingchan/Desktop/papers/wetting on elastic surface/StaticTheory/1992_ma00037a015.pdf:pdf},
issn = {15205835},
journal = {Macromolecules},
number = {11},
pages = {2882--2889},
title = {{Surface Modes and Deformation Energy of a Molten Polymer Brush}},
volume = {25},
year = {1992}
}
@article{Vekstein2020,
abstract = {A comprehensive textbook covering not only the ordinary theory of the deformation of solids, but also some topics not usually found in textbooks on the subject, such as thermal conduction and viscosity in solids.},
author = {Vekstein, Grigory},
doi = {10.1201/b16095-7},
file = {:Users/takshingchan/Desktop/papers/wetting on elastic surface/StaticTheory/IrgensChap7Elasticity.pdf:pdf},
journal = {Physics of Continuous Media},
pages = {234--259},
title = {{- Theory of elasticity}},
year = {2020}
}
@article{Shanahan1988,
abstract = {The liquid-fluid tension at the edge of a liquid drop may provoke a wetting ridge on a sufficiently soft solid substrate. Many soft solids such as polymers, and in particular elastomers, are viscoelastic and display hysteretic characteristics in a strain cycle. Such a strain cycle can be present near the advancing wetting ridge of a spreading drop. By considering that the excess capillary free energy is consumed during spreading by both viscous dissipation in the liquid and by mechanical, viscoelastic hysteresis in the solid, it is shown how spreading properties may be modified. An important degree of wetting hysteresis may result. In addition absolute spreading rates are reduced. {\textcopyright} 1988 IOP Publishing Ltd.},
author = {Shanahan, M. E.R.},
doi = {10.1088/0022-3727/21/6/019},
file = {:Users/takshingchan/Desktop/papers/wetting on elastic surface/StaticTheory/M_E_R_Shanahan_1988_J._Phys._D%3A_Appl._Phys._21_981.pdf:pdf},
issn = {13616463},
journal = {Journal of Physics D: Applied Physics},
number = {6},
pages = {981--985},
title = {{The spreading dynamics of a liquid drop on a viscoelastic solid}},
volume = {21},
year = {1988}
}
@article{Pandey2020,
abstract = {The mechanical and chemical properties of soft solids are crucial to many applications in biology and surface science. Recent studies use wetting by liquid drops to probe the surface mechanics of reticulated polymer networks, leading to controversial interpretations. This controversy relates to the long-standing paradox of Young's law for the liquid contact angle, which invokes only a horizontal force balance. Recent work shows that, for very soft materials, the solid's surface tension plays a key role for the vertical force balance, involving a singular ridgelike deformation exactly at the point where the droplet pulls on the network. A hotly debated question is whether unexpected measurements on this singular deformation can be attributed to nonlinear bulk elasticity or whether these provide evidence for an intricate surface elasticity, known as the Shuttleworth effect. Here, we theoretically reveal the nature of the elastocapillary singularity on a hyperelastic substrate with various constitutive relations for the interfacial energy. First, we finely resolve the vicinity of the singularity using goal-adaptive finite-element simulations. This simulation confirms that bulk elasticity cannot affect the force balance at the contact line. Subsequently, we derive exact solutions of nonlinear elasticity that describe the singularity analytically. These solutions are in perfect agreement with numerics and show that both the angles and stretch at the contact line, as previously measured experimentally, consistently point to a strong Shuttleworth effect. Finally, using Noether's theorem, we reveal the quantitative link between Young's law, hysteresis, and the nature of the elastocapillary singularity. Our contribution closes the issue of the missing normal force at the contact line and opens up the development of modern techniques in polymer surface science.},
author = {Pandey, A. and Andreotti, B. and Karpitschka, S. and {Van Zwieten}, G. J. and {Van Brummelen}, E. H. and Snoeijer, J. H.},
doi = {10.1103/PhysRevX.10.031067},
file = {:Users/takshingchan/Desktop/papers/wetting on elastic surface/StaticTheory/PhysRevX.10.031067.pdf:pdf},
issn = {21603308},
journal = {Physical Review X},
keywords = {doi:10.1103/PhysRevX.10.031067 url:https://doi.org/10.1103/PhysRevX.10.031067,soft matter},
number = {3},
pages = {31067},
publisher = {American Physical Society},
title = {{Singular Nature of the Elastocapillary Ridge}},
url = {https://doi.org/10.1103/PhysRevX.10.031067},
volume = {10},
year = {2020}
}
@article{Xu2010,
abstract = {Colloidal coatings, such as paint, are all around us. However, we know little about the mechanics of the film-forming process because the composition and properties of drying coatings vary dramatically in space and time. To surmount this challenge, we extend traction force microscopy to quantify the spatial distribution of all three components of the stress at the interface of two materials. We apply this approach to image stress near the tip of a propagating interface crack in a drying colloidal coating and extract the stress intensity factor.},
author = {Xu, Ye and Engl, Wilfried C. and Jerison, Elizabeth R. and Wallenstein, Kevin J. and Hyland, Callen and Wilen, Larry A. and Dufresne, Eric R.},
doi = {10.1073/pnas.1005537107},
file = {:Users/takshingchan/Desktop/papers/wetting on elastic surface/StaticTheory/PNAS_Xu_14964.full (1).pdf:pdf},
issn = {00278424},
journal = {Proceedings of the National Academy of Sciences of the United States of America},
keywords = {Ceramics,Colloids,Fracture mechanics},
number = {34},
pages = {14964--14967},
title = {{Imaging in-plane and normal stresses near an interface crack using traction force microscopy}},
volume = {107},
year = {2010}
}
@article{Xu2017,
abstract = {Surface stress, also known as surface tension, is a fundamental material property of any interface. However, measurements of solid surface stress in traditional engineering materials, such as metals and oxides, have proven to be very challenging. Consequently, our understanding relies heavily on untested theories, especially regarding the strain dependence of this property. Here, we take advantage of the high compliance and large elastic deformability of a soft polymer gel to directly measure solid surface stress as a function of strain. As anticipated by theoretical work for metals, we find that the surface stress depends on the strain via a surface modulus. Remarkably, the surface modulus of our soft gels is many times larger than the zero-strain surface tension. This suggests that surface stresses can play a dominant role in solid mechanics at larger length scales than previously anticipated.},
archivePrefix = {arXiv},
arxivId = {1702.00684},
author = {Xu, Qin and Jensen, Katharine E. and Boltyanskiy, Rostislav and Sarfati, Rapha{\"{e}}l and Style, Robert W. and Dufresne, Eric R.},
doi = {10.1038/s41467-017-00636-y},
eprint = {1702.00684},
file = {:Users/takshingchan/Desktop/papers/wetting on elastic surface/StaticTheory/s41467-017-00636-y.pdf:pdf},
issn = {20411723},
journal = {Nature Communications},
number = {1},
pages = {1--6},
pmid = {28916752},
publisher = {Springer US},
title = {{Direct measurement of strain-dependent solid surface stress}},
url = {http://dx.doi.org/10.1038/s41467-017-00636-y},
volume = {8},
year = {2017}
}
@article{Schulman2018,
abstract = {Surface stress and surface energy are fundamental quantities which characterize the interface between two materials. Although these quantities are identical for interfaces involving only fluids, the Shuttleworth effect demonstrates that this is not the case for most interfaces involving solids, since their surface energies change with strain. Crystalline materials are known to have strain-dependent surface energies, but in amorphous materials, such as polymeric glasses and elastomers, the strain dependence is debated due to a dearth of direct measurements. Here, we utilize contact angle measurements on strained glassy and elastomeric solids to address this matter. We show conclusively that interfaces involving polymeric glasses exhibit strain-dependent surface energies, and give strong evidence for the absence of such a dependence for incompressible elastomers. The results provide fundamental insight into our understanding of the interfaces of amorphous solids and their interaction with contacting liquids.},
archivePrefix = {arXiv},
arxivId = {1711.09320},
author = {Schulman, Rafael D. and Trejo, Miguel and Salez, Thomas and Rapha{\"{e}}l, Elie and Dalnoki-Veress, Kari},
doi = {10.1038/s41467-018-03346-1},
eprint = {1711.09320},
file = {:Users/takshingchan/Desktop/papers/wetting on elastic surface/StaticTheory/s41467-018-03346-1.pdf:pdf},
issn = {20411723},
journal = {Nature Communications},
number = {1},
pages = {8--13},
pmid = {29515162},
publisher = {Springer US},
title = {{Surface energy of strained amorphous solids}},
url = {http://dx.doi.org/10.1038/s41467-018-03346-1},
volume = {9},
year = {2018}
}
@article{Pericet-Camara2009,
abstract = {A sessile droplet can deform the surface of a soft solid not only with its weight. The surface tension pulls up a ridge at the perimeter of the drop, and the capillary pressure embosses a quasi-spherical dimple underneath the drop. This holds for the case of a bulk solid. However, if the solid forms a film with thickness comparable to the deformation scale the shape and the depth of the dimple are strongly distorted. We investigated dimples on elastomer films with a Young's modulus of 25 kPa and thickness in the range 4-104 m embossed by sessile ionic liquid droplets. The films are supported by an undeformable glass slide. Below a certain critical film thickness, the dimple is shallower and the ridge at the drop rim is less elevated than for the bulk elastomer. The deviations are more pronounced for thinner films. Further, troughs form at the two sides of the ridge. Their distance from the rim is equivalent to the layer thickness. The measurements are qualitatively reproduced by an analytical model and quantitatively by numerical simulations. A consistent physical picture of the deformation on the bulk elastomer and of the distortions on the thin films is given. {\textcopyright} 2009 The Royal Society of Chemistry.},
author = {Pericet-Camara, Ramon and Auernhammer, G{\"{u}}nter K. and Koynov, Kaloian and Lorenzoni, Simone and Raiteri, Roberto and Bonaccurso, Elmar},
doi = {10.1039/b907212h},
file = {:Users/takshingchan/Desktop/papers/wetting on elastic surface/StaticTheory/SoftMatter2009_b907212h.pdf:pdf},
issn = {1744683X},
journal = {Soft Matter},
number = {19},
pages = {3611--3617},
title = {{Solid-supported thin elastomer films deformed by microdrops}},
volume = {5},
year = {2009}
}
@article{Marchand2012a,
abstract = {The surface free energy, or surface tension, of a liquid interface gives rise to a pressure jump when the interface is curved. Here we show that a similar capillary pressure arises at the interface of soft solids. We present experimental evidence that immersion of a thin elastomeric wire into a liquid induces a substantial elastic compression due to the solid capillary pressure at the bottom. We quantitatively determine the effective surface tension from the elastic displacement field and find a value comparable to the liquid-vapor surface tension. Most importantly, these results also reveal the way the liquid pulls on the solid close to the contact line: the capillary force is not oriented along the liquid-air interface, nor perpendicularly to the solid surface, as previously hypothesized, but towards the interior of the liquid. {\textcopyright} 2012 American Physical Society.},
archivePrefix = {arXiv},
arxivId = {1201.4268},
author = {Marchand, Antonin and Das, Siddhartha and Snoeijer, Jacco H. and Andreotti, Bruno},
doi = {10.1103/PhysRevLett.108.094301},
eprint = {1201.4268},
file = {:Users/takshingchan/Downloads/PhysRevLett.108.094301.pdf:pdf},
issn = {00319007},
journal = {Physical Review Letters},
number = {9},
pages = {1--5},
title = {{Capillary pressure and contact line force on a soft solid}},
volume = {108},
year = {2012}
}
@article{Marchand2012,
abstract = {The contact angle that a liquid drop makes on a soft substrate does not obey the classical Young's relation, since the solid is deformed elastically by the action of the capillary forces. The finite elasticity of the solid also renders the contact angles differently from those predicted by Neumann's law, which applies when the drop is floating on another liquid. Here, we derive an elastocapillary model for contact angles on a soft solid by coupling a mean-field model for the molecular interactions to elasticity. We demonstrate that the limit of a vanishing elastic modulus yields Neumann's law or a variation thereof, depending on the force transmission in the solid surface layer. The change in contact angle from the rigid limit to the soft limit appears when the length scale defined by the ratio of surface tension to elastic modulus $\gamma$/E reaches the range of molecular interactions. {\textcopyright} 2012 American Physical Society.},
archivePrefix = {arXiv},
arxivId = {1205.2883},
author = {Marchand, Antonin and Das, Siddhartha and Snoeijer, Jacco H. and Andreotti, Bruno},
doi = {10.1103/PhysRevLett.109.236101},
eprint = {1205.2883},
file = {:Users/takshingchan/Downloads/PhysRevLett.109.236101.pdf:pdf},
issn = {00319007},
journal = {Physical Review Letters},
number = {23},
pages = {1--5},
title = {{Contact angles on a soft solid: From young's law to neumann's law}},
volume = {109},
year = {2012}
}
@article{Fan2020,
abstract = {We investigate the underlying mechanism of capillary force balance at the contact line. In particular, we offer a novel approach to describe and quantify the capillary force on the liquid in coexistence with its vapor phase, which is crucial in wetting and spreading dynamics. Its relation with the interface tension is elucidated. The proposed model is verified by our molecular dynamics simulations over a wide contact angle range. Differences in capillary forces are observed in evaporating droplets on homogeneous and decorated surfaces. Our findings not only provide a theoretical insight into capillary forces at the contact line, but also validate Young's equation based on a mechanical interpretation.},
author = {Fan, Jingcun and {De Coninck}, Jo{\"{e}}l and Wu, Hengan and Wang, Fengchao},
doi = {10.1103/PhysRevLett.124.125502},
file = {:Users/takshingchan/Desktop/papers/wetting on elastic surface/AboutForceAtCL/PhysRevLett2000.124.125502.pdf:pdf},
issn = {10797114},
journal = {Physical Review Letters},
keywords = {doi:10.1103/PhysRevLett.124.125502 url:https://doi},
number = {12},
pages = {125502},
pmid = {32281863},
publisher = {American Physical Society},
title = {{Microscopic Origin of Capillary Force Balance at Contact Line}},
url = {https://doi.org/10.1103/PhysRevLett.124.125502},
volume = {124},
year = {2020}
}
@article{Seveno2013,
abstract = {In 1805, Thomas Young was the first to propose an equation to predict the value of the equilibrium contact angle of a liquid on a solid. Today, the force exerted by a liquid on a solid, such as a flat plate or fiber, is routinely used to assess this angle. Moreover, it has recently become possible to study wetting at the nanoscale using an atomic force microscope. Here, we report the use of molecular-dynamics simulations to investigate the force distribution along a 15 nm fiber dipped into a liquid meniscus. We find very good agreement between the measured force and that predicted by Young's equation. {\textcopyright} 2013 American Physical Society.},
author = {Seveno, David and Blake, Terence D. and {De Coninck}, Jo{\"{e}}l},
doi = {10.1103/PhysRevLett.111.096101},
file = {:Users/takshingchan/Desktop/papers/wetting on elastic surface/AboutForceAtCL/PhysRevLett.111.096101.pdf:pdf},
issn = {00319007},
journal = {Physical Review Letters},
number = {9},
pages = {1--4},
title = {{Young's equation at the nanoscale}},
volume = {111},
year = {2013}
}
@article{Xu2010a,
abstract = {Colloidal coatings, such as paint, are all around us. However, we know little about the mechanics of the film-forming process because the composition and properties of drying coatings vary dramatically in space and time. To surmount this challenge, we extend traction force microscopy to quantify the spatial distribution of all three components of the stress at the interface of two materials. We apply this approach to image stress near the tip of a propagating interface crack in a drying colloidal coating and extract the stress intensity factor.},
author = {Xu, Ye and Engl, Wilfried C. and Jerison, Elizabeth R. and Wallenstein, Kevin J. and Hyland, Callen and Wilen, Larry A. and Dufresne, Eric R.},
doi = {10.1073/pnas.1005537107},
file = {:Users/takshingchan/Desktop/papers/wetting on elastic surface/Style_Dufresne/14964.full.pdf:pdf},
issn = {00278424},
journal = {Proceedings of the National Academy of Sciences of the United States of America},
keywords = {Ceramics,Colloids,Fracture mechanics},
number = {34},
pages = {14964--14967},
title = {{Imaging in-plane and normal stresses near an interface crack using traction force microscopy}},
volume = {107},
year = {2010}
}
@article{Style2017,
abstract = {It is widely appreciated that surface tension can dominate the behavior of liquids at small scales. Solids also have surface stresses of a similar magnitude, but they are usually overlooked. However, recent work has shown that these can play a central role in the mechanics of soft solids such as gels. Here, we review this emerging field. We outline the theory of surface stresses, from both mechanical and thermodynamic perspectives, emphasizing the relationship between surface stress and surface energy. We describe a wide range of phenomena at interfaces and contact lines where surface stresses play an important role. We highlight how surface stresses cause dramatic departures from classic theories for wetting (Young-Dupr{\'{e}}), adhesion (Johnson-Kendall-Roberts), and composites (Eshelby). A common thread is the importance of the ratio of surface stress to an elastic modulus, which defines a length scale below which surface stresses can dominate.},
archivePrefix = {arXiv},
arxivId = {1604.02052},
author = {Style, Robert W. and Jagota, Anand and Hui, Chung Yuen and Dufresne, Eric R.},
doi = {10.1146/annurev-conmatphys-031016-025326},
eprint = {1604.02052},
file = {:Users/takshingchan/Desktop/papers/wetting on elastic surface/Style_Dufresne/annurev-conmatphys-031016-025326.pdf:pdf},
issn = {19475462},
journal = {Annual Review of Condensed Matter Physics},
keywords = {Analytical methods, numerical methods,Capillarity,Elastomers,Gels,Soft interfaces,Surface stress},
pages = {99--118},
title = {{Elastocapillarity: Surface tension and the mechanics of soft solids}},
volume = {8},
year = {2017}
}
@article{Style2012,
abstract = {Young's law fails on soft solid and liquid substrates where there are substantial deformations near the contact line. On liquid substrates, this is captured by Neumann's classic analysis, which provides a geometrical construction for minimising the interfacial free energy. On soft solids, the total free energy includes an additional contribution from elasticity. A linear-elastic model incorporating an out-of-plane restoring force due to solid surface tension was recently shown to accurately predict the equilibrium shape of a thin elastic film due to a large sessile droplet. Here, we extend this model to find substrate deformations due to droplets of arbitrary size. While the macroscopic contact angle matches Young's law for large droplets, it matches Neumann's prediction for small droplets. The cross-over droplet size is roughly given by the ratio of the solid's surface tension and elastic modulus. On thin substrates at this cross-over, the macroscopic contact angle increases, indicating that the substrate is effectively less wetting. For droplets of all sizes, the microscopic behaviour near the contact line follows the Neumann construction giving local force balance. {\textcopyright} The Royal Society of Chemistry 2012.},
archivePrefix = {arXiv},
arxivId = {1203.1654},
author = {Style, Robert W. and Dufresne, Eric R.},
doi = {10.1039/c2sm25540e},
eprint = {1203.1654},
file = {:Users/takshingchan/Desktop/papers/wetting on elastic surface/Style_Dufresne/c2sm25540e-2.pdf:pdf},
issn = {1744683X},
journal = {Soft Matter},
number = {27},
pages = {7177--7184},
title = {{Static wetting on deformable substrates, from liquids to soft solids}},
volume = {8},
year = {2012}
}

@article{Xu2010a,
abstract = {Colloidal coatings, such as paint, are all around us. However, we know little about the mechanics of the film-forming process because the composition and properties of drying coatings vary dramatically in space and time. To surmount this challenge, we extend traction force microscopy to quantify the spatial distribution of all three components of the stress at the interface of two materials. We apply this approach to image stress near the tip of a propagating interface crack in a drying colloidal coating and extract the stress intensity factor.},
author = {Xu, Ye and Engl, Wilfried C. and Jerison, Elizabeth R. and Wallenstein, Kevin J. and Hyland, Callen and Wilen, Larry A. and Dufresne, Eric R.},
doi = {10.1073/pnas.1005537107},
file = {:Users/takshingchan/Desktop/papers/wetting on elastic surface/Style_Dufresne/14964.full.pdf:pdf},
issn = {00278424},
journal = {Proceedings of the National Academy of Sciences of the United States of America},
keywords = {Ceramics,Colloids,Fracture mechanics},
number = {34},
pages = {14964--14967},
title = {{Imaging in-plane and normal stresses near an interface crack using traction force microscopy}},
volume = {107},
year = {2010}
}


@article{Seveno2013,
abstract = {In 1805, Thomas Young was the first to propose an equation to predict the value of the equilibrium contact angle of a liquid on a solid. Today, the force exerted by a liquid on a solid, such as a flat plate or fiber, is routinely used to assess this angle. Moreover, it has recently become possible to study wetting at the nanoscale using an atomic force microscope. Here, we report the use of molecular-dynamics simulations to investigate the force distribution along a 15 nm fiber dipped into a liquid meniscus. We find very good agreement between the measured force and that predicted by Young's equation. {\textcopyright} 2013 American Physical Society.},
author = {Seveno, David and Blake, Terence D. and {De Coninck}, Jo{\"{e}}l},
doi = {10.1103/PhysRevLett.111.096101},
file = {:Users/takshingchan/Desktop/papers/wetting on elastic surface/AboutForceAtCL/PhysRevLett.111.096101.pdf:pdf},
issn = {00319007},
journal = {Physical Review Letters},
number = {9},
pages = {1--4},
title = {{Young's equation at the nanoscale}},
volume = {111},
year = {2013}
}
@article{Fan2020,
abstract = {We investigate the underlying mechanism of capillary force balance at the contact line. In particular, we offer a novel approach to describe and quantify the capillary force on the liquid in coexistence with its vapor phase, which is crucial in wetting and spreading dynamics. Its relation with the interface tension is elucidated. The proposed model is verified by our molecular dynamics simulations over a wide contact angle range. Differences in capillary forces are observed in evaporating droplets on homogeneous and decorated surfaces. Our findings not only provide a theoretical insight into capillary forces at the contact line, but also validate Young's equation based on a mechanical interpretation.},
author = {Fan, Jingcun and {De Coninck}, Jo{\"{e}}l and Wu, Hengan and Wang, Fengchao},
doi = {10.1103/PhysRevLett.124.125502},
file = {:Users/takshingchan/Desktop/papers/wetting on elastic surface/AboutForceAtCL/PhysRevLett2000.124.125502.pdf:pdf},
issn = {10797114},
journal = {Physical Review Letters},
keywords = {doi:10.1103/PhysRevLett.124.125502 url:https://doi},
number = {12},
pages = {125502},
pmid = {32281863},
publisher = {American Physical Society},
title = {{Microscopic Origin of Capillary Force Balance at Contact Line}},
url = {https://doi.org/10.1103/PhysRevLett.124.125502},
volume = {124},
year = {2020}
}


@article{Ashrafi2009,
abstract = {Structural analysis of viscoelastic solid polymers is one of the most important subjects in engineering structures. Several attempts have been so far made for the integral equation approach to viscoelastic problems. From the basic assumptions of viscoelastic constitutive equations and weighted residual techniques, a simple but effective boundary element formulation (BEF) is implemented for the standard linear solid (SLS) viscoelastic models. The SLS model provides an approximate representation of the observed behavior of a real polymer in its viscoelastic range. This formulation needs only Kelvin's fundamental solution of isotropic elastostatics with material constants prescribed as explicit functions of time. This approach avoids the use of relaxation functions and mathematical transformations, and it is able to solve the quasistatic viscoelastic problems with any load time-dependence and boundary conditions. As an application, a numerical example is provided to validate the proposed formulation. The problem of the pressurization of thick-walled cylindrical viscoelastic tanks made of PMMA polymer is completely analyzed by this approach. {\textcopyright} 2009 Springer Science+Business Media, Inc.},
author = {Ashrafi, H. and Farid, M.},
doi = {10.1007/s10598-009-9046-x},
file = {:Users/takshingchan/Desktop/papers/wetting on elastic surface/BEM/viscoelastic/Ashrafi-Farid2009_Article_AMathematicalBoundaryIntegralE.pdf:pdf},
issn = {1046283X},
journal = {Computational Mathematics and Modeling},
number = {4},
pages = {397--415},
title = {{A mathematical boundary integral equation analysis of standard viscoelastic solid polymers}},
volume = {20},
year = {2009}
}
@article{Jamshidi2019,
abstract = {An improved meshfree radial point interpolation method (RPIM) is formulated for quasi-static and dynamic analyses of 2D inhomogeneous viscoelastic solids. The presented improved RPIM is formulated in time domain, in which, there is no need for the viscoelastic material to obey the correspondence principle and therefore, all kinds of inhomogeneous viscoelastic materials can be analyzed by the method. The domain integrals, appeared in the proposed RPIM, are computed by the Cartesian transformation method (CTM), which is a truly meshfree integration technique. In the implementation of the CTM no background mesh is required and the domain integrals are computed accurately and efficiently. The accuracy of the method is studied by presenting several numerical examples. The results are compared with available analytic or numerical solutions and very good agreement is observed in all cases.},
author = {Jamshidi, B. and Hematiyan, M. R. and Mahzoon, M.},
doi = {10.1016/j.enganabound.2019.04.031},
file = {:Users/takshingchan/Desktop/papers/wetting on elastic surface/BEM/viscoelastic/1-s2.0-S0955799718304983-main.pdf:pdf},
issn = {09557997},
journal = {Engineering Analysis with Boundary Elements},
keywords = {Correspondence principle,Functionally graded material,Mesh free radial point interpolation method,Time domain,Viscoelastic},
number = {April},
pages = {59--67},
publisher = {Elsevier Ltd},
title = {{An improved time domain meshfree method for analysis of quasi-static and dynamic inhomogeneous viscoelastic problems}},
url = {https://doi.org/10.1016/j.enganabound.2019.04.031},
volume = {106},
year = {2019}
}

@article{Gonzalez2004,
abstract = {In this paper a novel approach to the problem of steady state moving loads along the boundary of a linear-viscoelastic two-dimensional (2D) solid, without considering the inertial effects, is presented. Using the Correspondence Principle, a closed form of the fundamental solution for a static load inside a 2D viscoelastic space can be easily obtained. This solution is later extended to the particular case of a load traveling with constant velocity along the x axis. An Eulerian description of the motion is adopted using a reference system that is moving with the load, which makes the problem time independent. Finally, this formulation is introduced into a traditional Boundary Element scheme and tested by solving some problems. {\textcopyright} 2003 Elsevier Ltd. All rights reserved.},
author = {Gonz{\'{a}}lez, Jos{\'{e}} A. and Abascal, Ram{\'{o}}n},
doi = {10.1016/j.enganabound.2003.10.005},
file = {:Users/takshingchan/Desktop/papers/wetting on elastic surface/BEM/viscoelastic/1-s2.0-S0955799703001851-main.pdf:pdf},
issn = {09557997},
journal = {Engineering Analysis with Boundary Elements},
keywords = {Boundary element method,Steady-state moving loads,Viscoelasticity},
number = {7},
pages = {815--823},
title = {{Linear viscoelastic boundary element formulation for steady state moving loads}},
volume = {28},
year = {2004}
}

@article{Zhang2010,
abstract = {Deformations such as crack opening and sliding displacements in a cracked viscoelastic body are numerically investigated by the extended finite element method (XFEM). The solution is carried out directly in time domain with a mesh not conforming to the crack geometry. The generalized Heaviside function is used to reflect the displacement discontinuity across a crack surface while the basis functions extracted from the viscoelastic asymptotic fields are used to manifest the gradient singularity at a crack tip. With these treatments, the XFEM formulations are derived in an incremental form. In evaluating the stiffness matrix, a selective integration scheme is suggested for problems with high Poisson ratios often encountered in viscoelastic materials over different element types in the XFEM. Numerical examples show that the crack opening displacement and crack sliding displacement are satisfactory. {\textcopyright} 2010 Elsevier Ltd. All rights reserved.},
author = {Zhang, H. H. and Rong, G. and Li, L. X.},
doi = {10.1016/j.enganabound.2010.02.001},
file = {:Users/takshingchan/Desktop/papers/wetting on elastic surface/BEM/viscoelastic/1-s2.0-S0955799710000184-main.pdf:pdf},
issn = {09557997},
journal = {Engineering Analysis with Boundary Elements},
keywords = {Crack,Deformations,Linear viscoelasticity,XFEM},
number = {6},
pages = {619--624},
publisher = {Elsevier},
title = {{Numerical study on deformations in a cracked viscoelastic body with the extended finite element method}},
url = {http://dx.doi.org/10.1016/j.enganabound.2010.02.001},
volume = {34},
year = {2010}
}

@article{Khayat1998,
abstract = {A boundary element formulation is presented for the general two-dimensional simulation of confined two-phase incompressible flow of viscoelastic fluids. A boundary-only formulation is implemented for fluids obeying the Oldroyd-B constitutive equation. Similarly to the formulation in Part I for Newtonian fluids [Khayat et al. Engng Anal Boundary Elements 1997;19:279], the method requires the solution of two simultaneous integral equations on the interface between the two fluids and the confining solid boundary. Although the problem is formulated for any confining geometry, the method is illustrated for a deforming drop as it is driven by the ambient flow inside a convergent channel. The accuracy and convergence of the method are assessed by comparison with the analytical solution for two-phase Taylor-Couette flow, leading to excellent agreement. Further assessment is made by varying the time increment and mesh size of the discretized boundary for a drop deforming in a convergent channel. The influence of fluid elasticity is examined when one or both fluids are viscoelastic. {\textcopyright} 1998 Published by Elsevier Science Ltd. All rights reserved.},
author = {Khayat, Roger E.},
doi = {10.1016/s0955-7997(98)00056-3},
file = {:Users/takshingchan/Desktop/papers/wetting on elastic surface/BEM/viscoelastic/1-s2.0-S0955799798000563-main.pdf:pdf},
issn = {09557997},
journal = {Engineering Analysis with Boundary Elements},
keywords = {Boundary element analysis,Linear viscoelastic fluid,Planar drop deformation},
number = {4},
pages = {291--306},
title = {{Boundary element analysis of planar drop deformation in confined flow. Part II. Viscoelastic fluids}},
volume = {22},
year = {1998}
}

@article{Wang2007,
abstract = {A time domain boundary element method (BEM) is presented to model the quasi-static linear viscoelastic behavior of asphalt pavements. In the viscoelastic analysis, the fundamental solution is derived in terms of elemental displacement discontinuities (DDs) and a boundary integral equation is formulated in the time domain. The unknown DDs are assumed to vary quadratically in the spatial domain and to vary linearly in the time domain. The equation is then solved incrementally through the whole time history using an explicit time-marching approach. All the spatial and temporal integrations can be performed analytically, which guarantees the accuracy of the method and the stability of the numerical procedure. Several viscoelastic models such as Boltzmann, Burgers, and power-law models are considered to characterize the time-dependent behavior of linear viscoelastic materials. The numerical method is applied to study the load-induced stress redistribution and its effects on the cracking performance of asphalt pavements. Some benchmark problems are solved to verify the accuracy and efficiency of the approach. Numerical experiments are also carried out to demonstrate application of the method in pavement engineering. {\textcopyright} 2006 Elsevier Ltd. All rights reserved.},
author = {Wang, Jianlin and Birgisson, Bjorn},
doi = {10.1016/j.enganabound.2006.09.007},
file = {:Users/takshingchan/Desktop/papers/wetting on elastic surface/BEM/viscoelastic/TimeDomain_BEM1-s2.0-S0955799706001718-main.pdf:pdf},
issn = {09557997},
journal = {Engineering Analysis with Boundary Elements},
keywords = {Asphalt pavements,Displacement discontinuities,Stress redistribution,Time domain BEM,Time marching,Viscoelastic models,Viscoelasticity},
number = {3},
pages = {226--240},
title = {{A time domain boundary element method for modeling the quasi-static viscoelastic behavior of asphalt pavements}},
volume = {31},
year = {2007}
}
@article{Vekstein2020,
abstract = {A comprehensive textbook covering not only the ordinary theory of the deformation of solids, but also some topics not usually found in textbooks on the subject, such as thermal conduction and viscosity in solids.},
author = {Vekstein, Grigory},
doi = {10.1201/b16095-7},
file = {:Users/takshingchan/Desktop/papers/wetting on elastic surface/StaticTheory/IrgensChap7Elasticity.pdf:pdf},
journal = {Physics of Continuous Media},
pages = {234--259},
title = {{- Theory of elasticity}},
year = {2020}
}
@article{Liang2016,
abstract = {We use molecular dynamics simulations to study mechanical properties of polymeric nanocomposites of liquid inclusions in polymeric network matrix. The shear modulus of nanocomposite is shown to be a universal function of the elastocapillary number $\gamma$NL/(GNR0), where $\gamma$NL is the surface tension of the liquid/network interface, GN is the shear modulus of the network and R0 is the initial size of liquid inclusions. First, in the range of elastocapillary numbers, $\gamma$NL/(GNR0) < 1, the composite shear modulus increases with increasing elastocapillary number. In this interval of elastocapillary numbers, liquid inclusions soften the network such that the composite modulus GC is smaller than GN. However, for elastocapillary numbers $\gamma$NL/(GNR0) ≈ 2, the liquid inclusions begin to reinforce the network resulting in GC > GN. In such composites, the surface energy of the deformed liquid inclusions stiffens the composite. When the elastocapillary number increases further, $\gamma$NL/(GNR0) ≫ 1, the interfacial energy of network/liquid interface dominates the mechanical response of the composite. Elongation ratio of the liquid inclusions monotonically decreases with increasing elastocapillary number $\gamma$NL/(GNR0).},
author = {Liang, Heyi and Cao, Zhen and Dobrynin, Andrey V.},
doi = {10.1021/acs.macromol.6b01499},
file = {:Users/takshingchan/Desktop/papers/wetting on elastic surface/MD_simulations/acs.macromol.6b01499.pdf:pdf},
issn = {15205835},
journal = {Macromolecules},
number = {18},
pages = {7108--7115},
title = {{Molecular dynamics simulations of the effect of elastocapillarity on reinforcement of soft polymeric materials by liquid inclusions}},
volume = {49},
year = {2016}
}
@article{Schanz1997,
abstract = {The usual time domain Boundary Element Method (BEM) contains fundamental solutions which are convoluted with time-dependent boundary data and integrated over the boundary surface. If the fundamental solution is known, e.g., in Elastodynamics, the temporal convolution can be performed analytically when the boundary data are approximated by polynomial shape functions in time and in the boundary elements. This formulation is well known, but the resulting time-stepping BEM procedure produces instabilities and high numerical damping, when the time step size is chosen too small and too large, respectively. Moreover, in case of viscoelastic or poroelastic domains, the fundamental solution is known only in the frequency domain such that the time history of a response can only be obtained by an inverse transformation of the frequency domain results. Here, a new approach for the evaluation of the convolution integrals, the so-called "Operational Quadrature Methods" developed by LUBICH, is presented. In this formulation, the convolution integral is numerically approximated by a quadrature formula whose weights are determined by the Laplace transform of the fundamental solution and a linear multistep method. Hence, the frequency domain fundamental solution can be used without the need of an inverse transformation. Therefore, the extension to viscoelastic problems succeeds using the elastic-viscoelastic correspondence principle.},
author = {Schanz, M. and Antes, H.},
doi = {10.1007/s004660050265},
file = {:Users/takshingchan/Desktop/papers/wetting on elastic surface/BEM/viscoelastic/A_new_visco-_and_elastodynamic_time_domain_Boundar.pdf:pdf},
issn = {01787675},
journal = {Computational Mechanics},
number = {5},
pages = {452--459},
title = {{A new visco- and elastodynamic time domain boundary element formulation}},
volume = {20},
year = {1997}
}


@article{Khayat2000,
abstract = {An adaptive (Lagrangian) boundary element approach is proposed for the general three-dimensional drop deformation in confined flow. The adaptive method is stable as it includes remeshing capabilities of the deforming interface between drop and suspending fluid, and thus can handle large deformations. Both drop and surrounding fluid are viscous incompressible and can be Newtonian or viscoelastic. A boundary-only formulation is implemented for fluids obeying the linear Jeffrey's constitutive equation. Similarly to the formulation for two-dimensional Newtonian fluids (Khayat RE, Luciani A, Utracki LA. Boundary element analysis of planar drop deformation in confined flow. Part I. Newtonian fluids. Engineering Analysis of Boundary Elements 1997; 19: 279), the method requires the solution of two simultaneous integral equations on the interface between the two fluids and the confining solid boundary. Although the problem is formulated for any confining geometry, the method is illustrated for a deforming drop as it is driven by the ambient flow inside a cylindrical tube. The accuracy of the method is assessed by comparison with the analytical solution for two-phase radial spherical flow, leading to good agreement. The influence of mesh refinement is examined for a drop in simple shear flow. Copyright (C) 2000 John Wiley and Sons, Ltd.},
author = {Khayat, Roger E.},
doi = {10.1002/1097-0363(20001015)34:3<241::AID-FLD57>3.0.CO;2-1},
file = {:Users/takshingchan/Desktop/papers/wetting on elastic surface/BEM/viscoelastic/Drop_1097-0363(20001015)34_3_241__AID-FLD57_3.0.CO\;2-1 (1).pdf:pdf},
issn = {02712091},
journal = {International Journal for Numerical Methods in Fluids},
keywords = {3D,Boundary element,Drop deformation,Viscoelastic systems},
number = {3},
pages = {241--275},
title = {{Three-dimensional boundary element analysis of drop deformation in confined flow for Newtonian and viscoelastic systems}},
volume = {34},
year = {2000}
}
@article{Snoeijer2018,
abstract = {The interfacial mechanics of soft elastic networks plays a central role in biological and technological contexts. Yet, effects of solid capillarity have remained controversial, primarily due to the strain-dependent surface energy. Here we derive the equations that govern the selection of contact angles of liquid drops on elastic surfaces from variational principles. It is found that the substrate's elasticity imposes a nontrivial condition that relates pinning, hysteresis, and contact line mobility to the so-called Shuttleworth effect. We experimentally validate our theory for droplets on a silicone gel, revealing an enhanced contact line mobility when stretching the substrate.},
archivePrefix = {arXiv},
arxivId = {1803.04428},
author = {Snoeijer, Jacco H. and Rolley, Etienne and Andreotti, Bruno},
doi = {10.1103/PhysRevLett.121.068003},
eprint = {1803.04428},
file = {:Users/takshingchan/Desktop/papers/wetting on elastic surface/Jacco/PhysRevLett.121.068003.pdf:pdf},
issn = {10797114},
journal = {Physical Review Letters},
keywords = {doi:10.1103/PhysRevLett.121.068003 url:https://doi},
number = {6},
pages = {68003},
pmid = {30141666},
publisher = {American Physical Society},
title = {{Paradox of Contact Angle Selection on Stretched Soft Solids}},
url = {https://doi.org/10.1103/PhysRevLett.121.068003},
volume = {121},
year = {2018}
}
@article{Press1993,
abstract = {In this paper, Boundary Element Method (BEM) is exploited for the numerical solution of interior acoustics problems governed by the Helmholtz's equation. A detailed literature survey on the application of the BEM to the radiation problems concerning the interior regions is presented. A formulation directed to the particular application of noise generation inside motor vehicle passenger compartments is developed. The solution of the problem is illustrated, in detail, on a classical acoustic problem, i.e. the acoustic response of a spherical cavity. The sound pressure variation along the radius is examined as a function of the dimensionless frequency number. The effect of an opening on the surface of the body is also examined},
author = {Press, W I T and Press, W I T},
file = {:Users/takshingchan/Desktop/papers/wetting on elastic surface/BEM/viscoelastic/TimeDomain_1993_BEMBE93005FU2.pdf:pdf},
journal = {Simulation},
pages = {11--21},
title = {{Transactions on Modelling and Simulation vol 6, {\textcopyright} 1993 WIT Press, www.witpress.com, ISSN 1743-355X}},
volume = {6},
year = {1993}
}
@article{Xu2010,
abstract = {Colloidal coatings, such as paint, are all around us. However, we know little about the mechanics of the film-forming process because the composition and properties of drying coatings vary dramatically in space and time. To surmount this challenge, we extend traction force microscopy to quantify the spatial distribution of all three components of the stress at the interface of two materials. We apply this approach to image stress near the tip of a propagating interface crack in a drying colloidal coating and extract the stress intensity factor.},
author = {Xu, Ye and Engl, Wilfried C. and Jerison, Elizabeth R. and Wallenstein, Kevin J. and Hyland, Callen and Wilen, Larry A. and Dufresne, Eric R.},
doi = {10.1073/pnas.1005537107},
file = {:Users/takshingchan/Desktop/papers/wetting on elastic surface/StaticTheory/PNAS_Xu_14964.full (1).pdf:pdf},
issn = {00278424},
journal = {Proceedings of the National Academy of Sciences of the United States of America},
keywords = {Ceramics,Colloids,Fracture mechanics},
number = {34},
pages = {14964--14967},
title = {{Imaging in-plane and normal stresses near an interface crack using traction force microscopy}},
volume = {107},
year = {2010}
}

@article{Snoeijer2020,
abstract = {Soft materials that are subjected to large deformations exhibit an extremely rich phenomenology, with properties lying in between those of simple fluids and those of elastic solids. In the continuum description of these systems, one typically follows either the route of solid mechanics (Lagrangian description) or the route of fluid mechanics (Eulerian description). The purpose of this review is to highlight the relationship between the theories of viscoelasticity and of elasticity, and to leverage this connection in contemporary soft matter problems. We review the principles governing models for viscoelastic liquids, for example solutions of flexible polymers. Such materials are characterized by a relaxation time $\lambda$, over which stresses relax. We recall the kinematics and elastic response of large deformations, and show which polymer models do (and which do not) correspond to a nonlinear elastic solid in the limit $\lambda$ → ∞. With this insight, we split the work done by elastic stresses into reversible and dissipative parts, and establish the general form of the conservation law for the total energy. The elastic correspondence can offer an insightful tool for a broad class of problems; as an illustration, we show how the presence or absence of an elastic limit determines the fate of an elastic thread during capillary instability.},
author = {Snoeijer, J. H. and Pandey, A. and Herrada, M. A. and Eggers, J.},
doi = {10.1098/rspa.2020.0419},
file = {:Users/takshingchan/Desktop/papers/wetting on elastic surface/Jacco/rspa.2020.0419ViscoelasticVsElastic.pdf:pdf},
issn = {14712946},
journal = {Proceedings of the Royal Society A: Mathematical, Physical and Engineering Sciences},
keywords = {capillarity,elasticity,gels,instability,viscoelasticity},
number = {2243},
title = {{The relationship between viscoelasticity and elasticity: Viscoelasticity and elasticity}},
volume = {476},
year = {2020}
}
@article{Das2011,
abstract = {A sessile liquid drop can deform the substrate on which it rests if the solid is sufficiently "soft." In this paper we compute the detailed spatial structure of the capillary forces exerted by the drop on the solid substrate using a model based on Density Functional Theory. We show that, in addition to the normal forces, the drop exerts a previously unaccounted tangential force. The resultant effect on the solid is a pulling force near the contact line directed towards the interior of the drop, i.e., not along the interface. The resulting elastic deformations of the solid are worked out and illustrate the importance of the tangential forces. {\textcopyright} 2011 American Institute of Physics.},
archivePrefix = {arXiv},
arxivId = {1103.0782},
author = {Das, Siddhartha and Marchand, Antonin and Andreotti, Bruno and Snoeijer, Jacco H.},
doi = {10.1063/1.3615640},
eprint = {1103.0782},
file = {:Users/takshingchan/Desktop/papers/wetting on elastic surface/Jacco/1.3615640 (1).pdf:pdf},
issn = {10706631},
journal = {Physics of Fluids},
number = {7},
title = {{Elastic deformation due to tangential capillary forces}},
volume = {23},
year = {2011}
}
@article{Gaul1999,
abstract = {As an alternative to domain discretization methods, the boundary element method (BEM) provides a powerful tool for the calculation of dynamic structural response in frequency and time domain. Field equations of motion and boundary conditions are cast into boundary integral equations (BIE), which are discretized only on the boundary. Fundamental solutions are used as weighting functions in the BIE which fulfil the Sommerfeld radiation condition, i.e., the energy radiation into a surrounding medium is modelled correctly. Therefore, infinite and semi-infinite domains can be effectively treated by the method. The soil represents such a semi-infinite domain in soil-structure-interaction problems. The response to vibratory loads superimposed to static pre-loads can often be calculated by linear viscoelastic constitutive equations. Conventional viscoelastic constitutive equations can be generalized by taking fractional order time derivatives into account. In the present paper two time domain BEM approaches including generalized viscoelastic behaviour are compared with the Laplace domain BEM approach and subsequent numerical inverse transformation. One of the presented time domain approaches uses an analytical integration of the elastodynamic BIE in a time step. Viscoelastic constitutive properties are introduced after Laplace transformation by means of an elastic-viscoelastic correspondence principle. The transient response is obtained by inverse transformation in each time step. The other time domain approach is based on the so-called 'convolution quadrature method'. In this formulation, the convolution integral in the BIE is numerically approximated by a quadrature formula whose weights are determined by the same Laplace transformed fundamental solutions used in the first method and a linear multistep method. A numerical study of wave propagation problems in 3-d viscoelastic continuum is performed for comparing the three BEM formulations.},
author = {Gaul, L. and Schanz, M.},
doi = {10.1016/S0045-7825(99)00032-8},
file = {:Users/takshingchan/Desktop/papers/wetting on elastic surface/BEM/viscoelastic/1-s2.0-S0045782599000328-main.pdf:pdf},
isbn = {7116856277},
issn = {00457825},
journal = {Computer Methods in Applied Mechanics and Engineering},
number = {1-2},
pages = {111--123},
title = {{A comparative study of three boundary element approaches to calculate the transient response of viscoelastic solids with unbounded domains}},
volume = {179},
year = {1999}
}
@article{Schulman2018,
abstract = {Surface stress and surface energy are fundamental quantities which characterize the interface between two materials. Although these quantities are identical for interfaces involving only fluids, the Shuttleworth effect demonstrates that this is not the case for most interfaces involving solids, since their surface energies change with strain. Crystalline materials are known to have strain-dependent surface energies, but in amorphous materials, such as polymeric glasses and elastomers, the strain dependence is debated due to a dearth of direct measurements. Here, we utilize contact angle measurements on strained glassy and elastomeric solids to address this matter. We show conclusively that interfaces involving polymeric glasses exhibit strain-dependent surface energies, and give strong evidence for the absence of such a dependence for incompressible elastomers. The results provide fundamental insight into our understanding of the interfaces of amorphous solids and their interaction with contacting liquids.},
archivePrefix = {arXiv},
arxivId = {1711.09320},
author = {Schulman, Rafael D. and Trejo, Miguel and Salez, Thomas and Rapha{\"{e}}l, Elie and Dalnoki-Veress, Kari},
doi = {10.1038/s41467-018-03346-1},
eprint = {1711.09320},
file = {:Users/takshingchan/Desktop/papers/wetting on elastic surface/StaticTheory/s41467-018-03346-1.pdf:pdf},
issn = {20411723},
journal = {Nature Communications},
number = {1},
pages = {8--13},
pmid = {29515162},
publisher = {Springer US},
title = {{Surface energy of strained amorphous solids}},
url = {http://dx.doi.org/10.1038/s41467-018-03346-1},
volume = {9},
year = {2018}
}
@article{Fan2021,
abstract = {We investigate the capillary force balance at the contact line on rough solid surfaces and in two-liquid systems. Our results confirm that solid-liquid interactions perpendicular to the interface have a significant influence on the lateral component of the capillary force exerted on the contact line. Surface roughness of the solid substrate reduces the mobility of liquid and alters how the perpendicular solid-liquid interactions transfer into a force acting parallel to the interface. A quantitative relation between surface roughness and the transfer strategy is proposed. Moreover, when a liquid is in coexistence with another immiscible liquid on a solid, the capillary forces exerted on liquids of both sides are involved in our theoretical model. The contact angle can be predicted by calculating three interfacial tensions. These arguments are then verified by molecular dynamics simulations. Our findings set up the generalized theoretical framework for the capillary force balance at the contact line and broaden its application in more realistic scenarios.},
author = {Fan, Jing Cun and {De Coninck}, Jo{\"{e}}l and Wu, Heng An and Wang, Feng Chao},
doi = {10.1016/j.jcis.2020.11.100},
file = {:Users/takshingchan/Desktop/papers/wetting on elastic surface/MD_simulations/1-s2.0-S0021979720316192-main.pdf:pdf},
issn = {10957103},
journal = {Journal of Colloid and Interface Science},
keywords = {Capillary force,Contact angle,Contact line,Molecular dynamics simulations,Roughness,Surface tension,Wetting,Young's equation},
pages = {320--327},
pmid = {33302048},
publisher = {Elsevier Inc.},
title = {{A generalized examination of capillary force balance at contact line: On rough surfaces or in two-liquid systems}},
url = {https://doi.org/10.1016/j.jcis.2020.11.100},
volume = {585},
year = {2021}
}

@article{Kusama1982,
abstract = {This paper analyses linear viscoelastic problems using the boundary element method together with the numerical inversion of the Laplace transform. This method reduces the amount of manual and computing time as compared with the finite element method. Two numerical examples are included to demonstrate the validity and accuracy of the method. {\textcopyright} 1982 Butterworth & Co. (Publishers) Ltd.},
author = {Kusama, Takashi and Mitsui, Yasushi},
doi = {10.1016/S0307-904X(82)80036-X},
file = {:Users/takshingchan/Desktop/papers/wetting on elastic surface/BEM/viscoelastic/1982_1-s2.0-S0307904X8280036X-main.pdf:pdf},
issn = {0307904X},
journal = {Applied Mathematical Modelling},
keywords = {boundary element method,linear viscoelastic analysis},
number = {4},
pages = {285--290},
title = {{Boundary element method applied to linear viscoelastic analysis}},
volume = {6},
year = {1982}
}


@article{Schanz1999,
abstract = {Viscoelastic solids may be effectively treated by the boundary element method (BEM) in the Laplace domain. However, calculation of transient response via the Laplace domain requires the inverse transform. Since all numerical inversion formulas depend heavily on a proper choice of their parameters, a direct evaluation in the time domain seems to be preferable. On the other hand, direct calculation of viscoelastic solids in the time domain requires the knowledge of viscoelastic fundamental solutions. Such solutions are simply obtained in the Laplace domain with the elastic-viscoelastic correspondence principle, but not in the time domain. Due to this, a quadrature rule for convolution integrals, the 'convolution quadrature method' proposed by Lubich, is applied. This numerical quadrature formula determines their integration weights from the Laplace transformed fundamental solution and a linear multistep method. Finally, a boundary element formulation in the time domain using all the advantages of the Laplace domain formulation is obtained. Even materials with complex Poisson ratio, leading to time-dependent integral free terms in the boundary integral equation, can be treated by this formulation. Two numerical examples, a 3D rod and an elastic concrete slab resting on a viscoelastic half-space, are presented in order to assess the accuracy and the parameter choice of the proposed method. Copyright {\textcopyright} 1999 John Wiley & Sons, Ltd.},
author = {Schanz, Martin},
doi = {10.1002/(sici)1099-0887(199911)15:11<799::aid-cnm294>3.0.co;2-f},
file = {:Users/takshingchan/Desktop/papers/wetting on elastic surface/BEM/viscoelastic/TimeDomain_cnme99AM (1).pdf:pdf},
issn = {10698299},
journal = {Communications in Numerical Methods in Engineering},
keywords = {Boundary integral equations,Time domain,Transform methods,Viscoelasticity},
number = {11},
pages = {799--809},
title = {{A boundary element formulation in time domain for viscoelastic solids}},
volume = {15},
year = {1999}
}

@article{Kirkwood1949,
abstract = {A general statistical mechanical theory of interfacial phenomena is developed and expressions are derived relating the surface tension and other superficial thermodynamic functions to the potential of intermolecular force and molecular distribution functions. On the basis of a reasonable approximation to the superficial density of molecular pairs, the Lennard-Jones potential and the Eisenstein-Gingrich radial distribution function, the surface tension, surface energy, and the superficial density of matter, referred to the surface of tension, are calculated for liquid argon at 90°K and compared with experiment. The positive value which is obtained for the superficial density, referred to the surface of tension, confirms the results of Tolman's quasi-thermodynamic theory and leads to the conclusion the surface tension of small drops decreases with increasing curvature.},
author = {Kirkwood, John G. and Buff, Frank P.},
doi = {10.1063/1.1747248},
file = {:Users/takshingchan/Desktop/papers/wetting on elastic surface/MD_simulations/StatisticalCompSurfaceTension_for MD.pdf:pdf},
issn = {00219606},
journal = {The Journal of Chemical Physics},
number = {3},
pages = {338--343},
title = {{The statistical mechanical theory of surface tension}},
volume = {17},
year = {1949}
}

@article{Zhou2019,
abstract = {The boundary element method (BEM) has been implemented in elasticity problems very successfully because of its high accuracy. However, there are very few investigations about BEM with concentrated loads. The displacement at the concentrated load point is infinite and traditional elements will lead inaccurate results near the concentrated load point. This paper proposes two types of displacement singular elements to approximate the displacement near concentrated load point, and high accuracy can be obtained without refinement. The second type of displacement singular element is a general element type, which can work well for both problems with or without boundary concentrated loads. Numerical examples have been studied and compared with results obtained by traditional BEM and finite element method (FEM) to show the necessary of the proposed methods.},
author = {Zhou, Wei and Yue, Qiang and Wang, Qiao and Feng, Y. T. and Chang, Xiaolin},
doi = {10.1016/j.enganabound.2018.11.016},
file = {:Users/takshingchan/Desktop/papers/wetting on elastic surface/BEM/viscoelastic/1-s2.0-S0955799718303722-main (1).pdf:pdf},
issn = {09557997},
journal = {Engineering Analysis with Boundary Elements},
keywords = {Boundary element method,Concentrated loads,Displacement singular element,Elasticity problem},
number = {December 2018},
pages = {195--205},
publisher = {Elsevier Ltd},
title = {{The boundary element method for elasticity problems with concentrated loads based on displacement singular elements}},
url = {https://doi.org/10.1016/j.enganabound.2018.11.016},
volume = {99},
year = {2019}
}
@article{Rizzo1971,
abstract = {A numerical solution procedure is given for plane boundary value problems of linear viscoelasticity theory, based on Kelvin's point force solution to the field equations of elasticity theory. Conditions for applicability of the correspondence principle are assumed; otherwise rather general material properties, domain shapes, and boundary conditions are considered. Systems of singular integral equations are formed and solved numerically in the Laplace transform space. Transform inversion is considered separately. Data for a familiar problem of an elastically reinforced viscoelastic cylinder are given for illustration. The procedure may be extended to include anisotropic viscoelastic behavior; also it is not inherently limited to plane problems.},
author = {Rizzo, F. J. and Shippy, D. J.},
doi = {10.1137/0121034},
file = {:Users/takshingchan/Desktop/papers/wetting on elastic surface/BEM/viscoelastic/viscoelastic_Rizzo.pdf:pdf},
issn = {0036-1399},
journal = {SIAM Journal on Applied Mathematics},
number = {2},
pages = {321--330},
title = {{An Application of the Correspondence Principle of Linear Viscoelasticity Theory}},
volume = {21},
year = {1971}
}
@article{Xu2017,
abstract = {Surface stress, also known as surface tension, is a fundamental material property of any interface. However, measurements of solid surface stress in traditional engineering materials, such as metals and oxides, have proven to be very challenging. Consequently, our understanding relies heavily on untested theories, especially regarding the strain dependence of this property. Here, we take advantage of the high compliance and large elastic deformability of a soft polymer gel to directly measure solid surface stress as a function of strain. As anticipated by theoretical work for metals, we find that the surface stress depends on the strain via a surface modulus. Remarkably, the surface modulus of our soft gels is many times larger than the zero-strain surface tension. This suggests that surface stresses can play a dominant role in solid mechanics at larger length scales than previously anticipated.},
archivePrefix = {arXiv},
arxivId = {1702.00684},
author = {Xu, Qin and Jensen, Katharine E. and Boltyanskiy, Rostislav and Sarfati, Rapha{\"{e}}l and Style, Robert W. and Dufresne, Eric R.},
doi = {10.1038/s41467-017-00636-y},
eprint = {1702.00684},
file = {:Users/takshingchan/Desktop/papers/wetting on elastic surface/StaticTheory/s41467-017-00636-y.pdf:pdf},
issn = {20411723},
journal = {Nature Communications},
number = {1},
pages = {1--6},
pmid = {28916752},
publisher = {Springer US},
title = {{Direct measurement of strain-dependent solid surface stress}},
url = {http://dx.doi.org/10.1038/s41467-017-00636-y},
volume = {8},
year = {2017}
}
@article{MayssaraA.AboHassaninSupervised2014,
abstract = {Seiring dengan kemajuan ilmu pengetahuan dan teknologi yang menjadi pusat perhatian dunia. Maka manusia dituntut untuk menciptakan peralatan-peralatan canggih untuk teknologi muktahir. Baik itu dalam bidang bisnis, perdagangan, kesehatan, militer, pendidikan, komunikasi dan budaya maupun bidang-bidang lainnya. Maka teknologi ini membawa perubahan pada peralatan-peralatan yang dulunya bekerja secara analog mulai dikembangkan secara digital, dan bahkan yang bekerjanya secara manual sekarang banyak dikembangkan secara otomatis, seperti kamera digital, handycam, dan sebagainya, dalam pembacaan pengukuran juga sudah dikembangkan ke dalam teknik digital. Contohnya perangkat Load Cell. Dan keuntungan menggunakan Load Cell adalah untuk mempermudah dalam pembacaan data untuk meminimalkan kesalahan dalam pembacaan data yang disebabkan adanya human error.Pada pemilihan Load Cell bertujuan untuk memilih kecocokan dalam membuat rancang bangun alat uji tarik kapasitas 3 ton, dimana dalam pemilihan ini kami memilih jenis load cell “S” karna alat yang kita rancang adalah uji tarik bukan uji tekan. Dengan kapasitas load cell 5 ton. Untuk membuat jarak aman dalam pengujian specimen ST41. Load Cell menggunakan system perangkat elektronik pengolahan data yang menjadi sebuah kurva tegangan regangan. Data-data yang diperoleh tersebut berupa besarnya pembebanan hasil dari pengujian specimen ST41. Kata},
author = {{Mayssara A. Abo Hassanin Supervised}, Affiifi.},
file = {:Users/takshingchan/Desktop/papers/wetting on elastic surface/Others/MovingVerticalDroplets2108.12002.pdf:pdf},
journal = {Paper Knowledge . Toward a Media History of Documents},
title = {{済無No Title No Title No Title}},
year = {2014}
}
@article{Fredrickson1992,
abstract = {We report on an analysis of the free energy of distortion of a molten polymer brush, such as a layer of block copolymer at an air interface. Within the Alexander-de Gennes approximation of a delta function distribution of chain ends, but rigorously enforcing incompressibility, we calculate the change in the free energy of a brush associated with a small-amplitude sinusoidal displacement of the free surface about the equilibrium height. Unlike the surface of a liquid, long-wavelength modes in a brush are suppressed due to the lateral chain stretching required to maintain constant density. We demonstrate the existence of a preferred wavelength for the surface modes of a molten brush and estimate the fluctuation amplitude. The energy cost to deform a brush with a blunt object, e.g., the tip of an atomic force microscope, is also discussed. {\textcopyright} 1992, American Chemical Society. All rights reserved.},
author = {Fredrickson, Glenn H. and Ajdari, Armand and Leibler, Ludwik and Carton, Jean Pierre},
doi = {10.1021/ma00037a015},
file = {:Users/takshingchan/Desktop/papers/wetting on elastic surface/StaticTheory/1992_ma00037a015.pdf:pdf},
issn = {15205835},
journal = {Macromolecules},
number = {11},
pages = {2882--2889},
title = {{Surface Modes and Deformation Energy of a Molten Polymer Brush}},
volume = {25},
year = {1992}
}
@article{Oliveira2017,
abstract = {The present study aims at performing a mechanical analysis of 2D viscoelastic cracked structural materials using the Boundary Element Method (BEM). The mesh dimensionality reduction provided by the BEM and its accuracy in representing high gradient fields make this numerical method robust to solve fracture mechanics problems. Viscoelastic models address phenomena that provide changes on the mechanical material properties along time. Well-established viscoelastic models such as Maxwell, Kelvin–Voigt and Boltzmann are used in this study. The numerical viscoelastic scheme, which is based on algebraic BEM equations, utilizes the Euler method for time derivative evaluation. Therefore, the unknown variables at the structural boundary and its variations along time are determined through an ordinary linear system of equations. Moreover, time-dependent boundary conditions may be considered, which represent loading phases. The dual BEM formulation is adopted for modelling the mechanical structural behaviour of cracks bodies. Three examples are considered to illustrate the robustness of the adopted formulation. The results achieved by the BEM are in good agreement with reported data and numerical stability is observed.},
author = {Oliveira, Hugo Luiz and Leonel, Edson Denner},
doi = {10.1007/s40091-016-0144-7},
file = {:Users/takshingchan/Desktop/papers/wetting on elastic surface/BEM/viscoelastic/Oliveira-Leonel2017_Article_ABEMFormulationAppliedInTheMec.pdf:pdf},
isbn = {4009101601},
issn = {20086695},
journal = {International Journal of Advanced Structural Engineering},
keywords = {Boundary element method,Fracture mechanics,Nonhomogeneous media,Viscoelasticity},
number = {1},
pages = {1--12},
publisher = {Springer Berlin Heidelberg},
title = {{A BEM formulation applied in the mechanical material modelling of viscoelastic cracked structures}},
volume = {9},
year = {2017}
}

@article{Shanahan1988a,
abstract = {The final equilibrium state and the spreading dynamics approaching equilibrium have been studied for a sessile drop posed on a thin solid. For the case of equilibrium, both axisymmetric and cylindrically symmetrical geometries have been considered. In both situations, but particularly the latter, liquid surface tension can markedly curve the initially planar solid. The dynamics of spreading can be speeded up by the presence of a thin substrate. Released elastic energy contributes to capillary effects in overcoming viscous resistance to flow.},
author = {Shanahan, Martin E. R.},
doi = {10.1051/rphysap:019880023060103100},
file = {:Users/takshingchan/Desktop/papers/wetting on elastic surface/StaticTheory/Shanahan_ajp-rphysap_1988_23_6_1031_0.pdf:pdf},
isbn = {0198800230601},
issn = {0035-1687},
journal = {Revue de Physique Appliqu{\'{e}}e},
number = {6},
pages = {1031--1037},
title = {{Statics and dynamics of wetting on thin solids}},
volume = {23},
year = {1988}
}
@article{Kern1992,
abstract = {The aim of this study is to formulate and solve the equilibrium shape of a liquid droplet of contact radius r0 in the middle of an elastic isotropic thin solid sheet of radius l, by using the different surface concepts such as surface free energy and surface stress. This is achieved by determining the form of the interfaces as a result of minimization of the total free energy of the system. The profiles are obtained from integration of Euler's differential equations. An interpretation of these equations is given in terms of mechanical forces. In the domain 0 < r < r0, normal to the sheet there act two shearing forces. One of them derives from Laplace's overpressure inside the drop. It is uniformly distributed over the area $\pi$r20. The other one, coming from the total surface stress of the sheet, leads to shearing forces proportional to the local slope. Outside the drop (r0 < r < l), there are at the same two types of normal shearing forces, one due to the surface stress, the other type acting on the triple line of length 2$\pi$r0. Each of these mechanical forces acts on distinct domains of the sheet. Therefore it is not allowed to superpose these forces acting on the entire sheet 0 < r < l. If such a superposition is unduly made, a ridge appears at the triple line. The liquid drop is found to be spherical as expected in the absence of gravity. If gravity acts, qualitative modifications are discussed. The profile of the sheet is pseudo-parabolic with an inflection circle of radius ri changing within 0 < ri < l according to the fastening ratio l r0 of the sheet. The sag under the drop depends on the Laplace overpressure and the flexure rigidity D of the sheet. It varies therefore with the contact angle as sin a and as ( r0 e)3, e being the sheet thickness. The sag approaches the value of e for radius r0 e > 10 when considering usual solids of Young-modulus E = 1012 erg cm-3. Earth gravity does not influence markedly the results for drops with r0 < 0.1 cm. The effect of surface stress s depends on the characteristic length |s|/D. It becomes numerically important only for very thin sheets. The total surface stress in 0 < r < r0 may enhance or decrease the sag according its sign. Instabilities (buckling) may occur above some limiting value |s|/D. For negative surface stress, the profile outside the droplet (r0 < r < l) shows oscillations which represent a stable situation. A sheet without droplet with negative surface stress shows buckling if its size l exceeds some critical value. The presence of a droplet is able to stabilize this situation. The final equilibrium problem is only solved by optimizing also the size r0 of the droplet so that the total free energy is minimal. From this, the wetting angle $\alpha$ and the deformation angle $\beta$ at the triple line are given analytically. The elastic properties of the sheet determine not only $\beta$ but also influences slightly $\alpha$. Finally, according to a tradition going back to Young-Maxwell and for the purpose in hands, we consider average thermodynamic forces acting along the triple line. We show that Young-Maxwell's construction based on Neumann's triangle is possible. Our equations show that Young's famous equation of wetting is true up to the second order of the deformation angle $\beta$. Calculating this order an extended Young's equation is given. Our general result is easily brought to the special cases where the droplet lies either on a membrane or on another liquid surface. {\textcopyright} 1992.},
author = {Kern, R. and M{\"{u}}ller, P.},
doi = {10.1016/0039-6028(92)90203-I},
file = {:Users/takshingchan/Desktop/papers/wetting on elastic surface/StaticTheory/1-s2.0-003960289290203I-main.pdf:pdf},
issn = {00396028},
journal = {Surface Science},
number = {3},
pages = {467--494},
title = {{Deformation of an elastic thin solid induced by a liquid droplet}},
volume = {264},
year = {1992}
}
@article{Yu2009,
abstract = {In this paper, the role of vertical component of surface tension of a droplet on the elastic deformation of a finite-thickness flexible membrane was theoretically analyzed using Hankel transformation. The vertical displacement at the surface was derived and can be reduced to Lester's or Rusanov's solutions when the thickness is infinite. Moreover, some simulations of the effect of a liquid droplet on a membrane with a finite thickness were made. The numerical results showed that there exists a saturated membrane thickness of the order of millimeter, when the thickness of a membrane is larger than such a value, the membrane can be regarded as a half-infinite body. Further numerical calculations for soft membrane whose thickness is far below the saturated thickness were made. By comparison between the maximum vertical displacement of an ultrathin soft membrane and a half-infinite body, we found that Lester's or Rusanov's solutions for a half-infinite body cannot correctly describe such cases. In other words, the thickness of a soft membrane has great effect on the surface deformation of the ultrathin membrane induced by a liquid droplet. {\textcopyright} 2009 Elsevier Inc. All rights reserved.},
author = {Yu, Ying Song and Zhao, Ya Pu},
doi = {10.1016/j.jcis.2009.08.001},
file = {:Users/takshingchan/Desktop/papers/wetting on elastic surface/StaticTheory/1-s2.0-S0021979709010303-main.pdf:pdf},
issn = {00219797},
journal = {Journal of Colloid and Interface Science},
keywords = {Droplet,Hankel transformation,Membrane,PDMS,Surface tension,Vertical component},
number = {2},
pages = {489--494},
publisher = {Elsevier Inc.},
title = {{Elastic deformation of soft membrane with finite thickness induced by a sessile liquid droplet}},
url = {http://dx.doi.org/10.1016/j.jcis.2009.08.001},
volume = {339},
year = {2009}
}
@article{Yu2012,
abstract = {Young's equation is a fundamental equation in capillarity and wetting, which reflects the balance of the horizontal components of the three interfacial tensions with the contact angle (CA). However, it does not consider the vertical component of the liquid-vapor interfacial tension (VCLVIT). It is now well understood that the VCLVIT causes the elastic deformation of the solid substrate, which plays a significant role in the fabrication of the microfluidic devices because of the wide use of the soft materials. In this paper, the theoretical, experimental, and numerical aspects of the problem are reviewed. The effects of the VCLVIT-induced surface deformation on the wetting and spreading, the deflection of the microcantilever, and the elasto-capillarity and electroelasto-capillarity are discussed. Besides a brief review on the historical development and the recent advances, some suggestions on the future research are also provided. {\textcopyright} Shanghai University and Springer-Verlag.},
author = {Yu, Ying Song},
doi = {10.1007/s10483-012-1608-x},
file = {:Users/takshingchan/Desktop/papers/wetting on elastic surface/StaticTheory/Yu2012_Article_SubstrateElasticDeformationDue (1).pdf:pdf},
issn = {02534827},
journal = {Applied Mathematics and Mechanics (English Edition)},
keywords = {Contact angle (CA),Liquid-vapor interfacial tension,Soft substrate,Surface deformation,Vertical component,Wetting},
number = {9},
pages = {1095--1114},
title = {{Substrate elastic deformation due to vertical component of liquid-vapor interfacial tension}},
volume = {33},
year = {2012}
}
@article{Xu2010,
abstract = {Colloidal coatings, such as paint, are all around us. However, we know little about the mechanics of the film-forming process because the composition and properties of drying coatings vary dramatically in space and time. To surmount this challenge, we extend traction force microscopy to quantify the spatial distribution of all three components of the stress at the interface of two materials. We apply this approach to image stress near the tip of a propagating interface crack in a drying colloidal coating and extract the stress intensity factor.},
author = {Xu, Ye and Engl, Wilfried C. and Jerison, Elizabeth R. and Wallenstein, Kevin J. and Hyland, Callen and Wilen, Larry A. and Dufresne, Eric R.},
doi = {10.1073/pnas.1005537107},
file = {:Users/takshingchan/Desktop/papers/wetting on elastic surface/Style_Dufresne/pnas.1005537107_SI (1).pdf:pdf},
issn = {00278424},
journal = {Proceedings of the National Academy of Sciences of the United States of America},
keywords = {Ceramics,Colloids,Fracture mechanics},
number = {34},
pages = {14964--14967},
title = {{Imaging in-plane and normal stresses near an interface crack using traction force microscopy}},
volume = {107},
year = {2010}
}


@article{Lester1961,
author = {Lester, G. R.},
journal = {Journal of Colloid Science},
number = {4},
pages = {315-326},
title = {{Contact angles of liquids at deformable solid surfaces}},
volume = {16},
year = {1961}
}

@article{Rusanov1975,
author = {Rusanov, A. I.},
journal = {Colloid Journal of the USSR},
pages = {614–622},
title = {{ Theory of wetting of elastically deformed bodies, 1. deformation with a finite contact-angle }},
volume = {37(4)},
year = {1975}
}


@article{Carre1996,
	Author = {Carr{\'e}, Alain and Gastel, Jean-Claude and Shanahan, Martin E. R.},
	Da = {1996/02/01},
	Id = {Carr{\'e}1996},
	Isbn = {1476-4687},
	Journal = {Nature},
	Number = {6564},
	Pages = {432--434},
	Title = {Viscoelastic effects in the spreading of liquids},
	Ty = {JOUR},
	Volume = {379},
	Year = {1996},
}

@article{Creton2016,
abstract = {Soft materials are materials with a low shear modulus relative to their bulk modulus and where elastic restoring forces are mainly of entropic origin. A sparse population of strong bonds connects molecules together and prevents macroscopic flow. In this review we discuss the current state of the art on how these soft materials break and detach from solid surfaces. We focus on how stresses and strains are localized near the fracture plane and how elastic energy can flow from the bulk of the material to the crack tip. Adhesion of pressure-sensitive-adhesives, fracture of gels and rubbers are specifically addressed and the key concepts are pointed out. We define the important length scales in the problem and in particular the elasto-adhesive length $\Gamma$/E where $\Gamma$ is the fracture energy and E is the elastic modulus, and how the ratio between sample size and $\Gamma$/E controls the fracture mechanisms. Theoretical concepts bridging solid mechanics and polymer physics are rationalized and illustrated by micromechanical experiments and mechanisms of fracture are described in detail. Open questions and emerging concepts are discussed at the end of the review.},
author = {Creton, Costantino and Ciccotti, Matteo},
doi = {10.1088/0034-4885/79/4/046601},
file = {:Users/takshingchan/Downloads/Creton_2016_Rep._Prog._Phys._79_046601 (1).pdf:pdf},
issn = {00344885},
journal = {Reports on Progress in Physics},
keywords = {adhesion,adhesive,elastomers,fracture,hydrogels,mechanical properties},
number = {4},
pages = {046601},
pmid = {27007412},
publisher = {IOP Publishing},
title = {{Fracture and adhesion of soft materials: A review}},
volume = {79},
year = {2016}
}
@article{Corominas-Murtra2021,
abstract = {Spatiotemporal changes in viscoelasticity are a key component of the morphogenesis of living systems. Experimental and theoretical findings suggest that cellular- and tissue-scale viscoelasticity can be understood as a collective property emerging from macromolecular and cellular interactions, respectively. Linking the changes in the structural or material properties of cells and tissues, such as material phase transitions, to the microscopic interactions of their constituents, is still a challenge both at the experimental and theoretical level. In this review, we summarize work on the viscoelastic nature of cytoskeletal, extracellular and cellular networks. We then conceptualize viscoelasticity as a network theory problem and discuss its applications in several biological contexts. We propose that the statistical mechanics of networks can be used in the future as a powerful framework to uncover quantitatively the biomechanical basis of viscoelasticity across scales.},
author = {Corominas-Murtra, Bernat and Petridou, Nicoletta I.},
doi = {10.3389/fphy.2021.666916},
file = {:Users/takshingchan/Downloads/fphy-09-666916 (1).pdf:pdf},
issn = {2296424X},
journal = {Frontiers in Physics},
keywords = {morphogenesis,network,percolation theory,rigidity,viscoelasticity},
number = {June},
pages = {1--17},
title = {{Viscoelastic Networks: Forming Cells and Tissues}},
volume = {9},
year = {2021}
}
@article{Style2018,
abstract = {Recent experiments have shown that surface stresses in soft materials can have a significant strain-dependence. Here we explore the implications of this surface elasticity to show how, and when, we expect it to arise. We develop the appropriate boundary condition, showing that it simplifies significantly in certain cases. We show that surface elasticity's main role is to stiffen a solid surface's response to in-plane tractions, in particular at length-scales smaller than a characteristic elastocapillary length. We also investigate how surface elasticity affects the Green's-function problem of a line force on a flat, incompressible, linear-elastic substrate. There are significant changes to this solution, especially in that the well-known displacement singularity is regularised. This raises interesting implications for soft phenomena like wetting contact lines, adhesion and friction. Finally, we discuss open questions, future directions, and close ties with existing fields of research.},
archivePrefix = {arXiv},
arxivId = {1801.07744},
author = {Style, Robert W. and Xu, Qin},
doi = {10.1039/c8sm00166a},
eprint = {1801.07744},
file = {:Users/takshingchan/Downloads/c8sm00166a (1).pdf:pdf},
issn = {17446848},
journal = {Soft Matter},
number = {22},
pages = {4569--4576},
pmid = {29808219},
publisher = {Royal Society of Chemistry},
title = {{The mechanical equilibrium of soft solids with surface elasticity}},
volume = {14},
year = {2018}
}


@article{Pu2012,
abstract = {Results are reported for a study on the evaporation of water droplets from a highly viscoelastic acrylic polymer surface. These are contrasted with those collected for the same measurements carried out on polydimethylsiloxane (PDMS). For PDMS, the evaporation process involves the expected multistep process including constant drop area, constant contact angle, and finally a combination of these steps until the liquid is gone. In contrast, water evaporation from the acrylic polymer shows a constant drop area mode throughout. Furthermore, during the evaporation process, the drop area actually expands on the acrylic polymer. The single mode evaporation process is consistent with formation of wetting structures, which cannot be propagated by the capillary forces. Expansion of the drop area is attributed to the influence of the drop capillary pressure. Furthermore, the rate of drop area expansion is shown to be dependent on the thickness of the polymer film. {\textcopyright} 2012 American Chemical Society.},
author = {Pu, Gang and Severtson, Steven J.},
doi = {10.1021/la301768h},
file = {:Users/takshingchan/Downloads/la301768h (1).pdf:pdf},
issn = {07437463},
journal = {Langmuir},
number = {26},
pages = {10007--10014},
pmid = {22647193},
title = {{Water evaporation on highly viscoelastic polymer surfaces}},
volume = {28},
year = {2012}
}

@Book{ Pozbook,
     author    = " C. Pozrikidis",
     title     = " Boundary Integral and singularity methods for linearized
               flow",
     publisher = {Cambridge University Press, Cambridge},
     year      = " 1992",
}

@article{Schanz1993,
author = {Schanz, M. and Gaul, L.  },
journal = {Appl. Mech. Rev.},
number = {(11S):},
pages = {S41-S46},
title = {{Implementation of Viscoelastic Behavior in a Time Domain Boundary Element Formulation}},
volume = {46},
year = {1993}
}

@article{Syngellakis2003,
author = {Syngellakis, Stavros},
doi = {10.1016/S0955-7997(02)00090-5},
file = {:Users/takshingchan/Downloads/1-s2.0-S0955799702000905-main.pdf:pdf},
issn = {09557997},
journal = {Engineering Analysis with Boundary Elements},
keywords = {Boundary element method,Polymers,Viscoelastic materials},
number = {2},
pages = {125--135},
title = {{Boundary element methods for polymer analysis}},
volume = {27},
year = {2003}
}

@article{Zabiegaj2021,
abstract = {Biofilm is a layer of syntrophic microorganisms stick to each other and to the surface. The importance of biofilms is enormous in various industrial applications and human everyday life. The effects of biofilm could be either positive or negative. Positive effects are encountered in industrial processes, bioremediation, and wastewater treatment. Negative effects are more common with the marine industry being one of the sectors, which confronts severe corrosion problems caused by biofouling on the surfaces of equipment and infrastructures. In space industry, microbial contamination and biofouling adversely affect both crew health and mission-related equipment, the latter including hardware, water systems, piping, and electrical tools. The capacity of biofilms to grow in space environment was confirmed already in 1991. One of the most important surface properties of biofilms is wettability, which dictates not only how a liquid spreads over the uneven external surface of biofilms but also how it penetrates into their porous and morphologically complex structure. To investigate wetting and spreading onto biofilms, model materials are often used to simulate different morphological and functional features of biofilms in a controlled way, for example, soft, deformable, soluble, structured, porous materials. Here, we review recent advances in wetting and spreading on porous and soft deformable surface together with biofilms wetting properties and its importance in space industry. We conclude with a discussion of the main directions for future research efforts regarding biofilm wetting.},
author = {Zabiegaj, Dominika and Hajirasouliha, Farzaneh and Duilio, Angela and Guido, Stefano and Caserta, Sergio and Kostoglou, Margaritis and Petala, Maria and Karapantsios, Thodoris and Trybala, Anna},
doi = {10.1016/j.cocis.2021.101426},
file = {:Users/takshingchan/Desktop/papers/wetting on elastic surface/RecentDownloaded2022Feb/1-s2.0-S1359029421000108-main.pdf:pdf},
issn = {18790399},
journal = {Current Opinion in Colloid and Interface Science},
keywords = {Bacteria motility,Biofilm,Contact angle,Deformable substrates,Microbial contamination,Porous media,Soft solids,Space applications,Spreading,Wetting},
pages = {101426},
publisher = {Elsevier Ltd},
title = {{Wetting/spreading on porous media and on deformable, soluble structured substrates as a model system for studying the effect of morphology on biofilms wetting and for assessing anti-biofilm methods}},
url = {https://doi.org/10.1016/j.cocis.2021.101426},
volume = {53},
year = {2021}
}
@article{Nadermann2013,
abstract = {We show that a drop of liquid a few hundred microns in diameter placed under a solid, elastic, thin film ($\sim$10 $\mu$mthick) causes it to bulge by tens of microns. The deformed shape is governed by equilibrium of tensions exerted by the various interfaces and the solid film, a form of Neumann's triangle. Unlike Young's equation, which specifies the contact angles at the junction of two fluids and a (rigid) solid, and is fundamentally underdetermined, both tensions in the solid film can be determined here if the liquid-vapor surface tension is known independently. Tensions in the solid film have a contribution from elastic stretch and a constant residual component. The residual component, extracted by extrapolation to films of vanishing thickness and supported by analysis of the elastic deformation, is interpreted as the solid-fluid surface tension, demonstrating that compliant thinfilm structures can be used to measure solid surface tensions.},
author = {Nadermann, Nichole and Hui, Chung Yuen and Jagota, Anand},
doi = {10.1073/pnas.1304587110},
file = {:Users/takshingchan/Desktop/papers/wetting on elastic surface/RecentDownloaded2022Feb/10541.full.pdf:pdf},
issn = {00278424},
journal = {Proceedings of the National Academy of Sciences of the United States of America},
keywords = {Membrane,Soft materials,Surface stress,Wetting},
number = {26},
pages = {10541--10545},
title = {{Solid surface tension measured by a liquid drop under a solid film}},
volume = {110},
year = {2013}
}
@article{Zhao2021,
abstract = {Whereas capillarity controls fluid dynamics at submillimeter scale and elasticity determines the mechanics of rigid solids, their coupling governs elastocapillary deformations on soft solids. Here, we directly probed the deformations on soft substrates induced by sessile nanodroplets. The wetting ridge created around the contact line and the dimple formed underneath the nanodroplet were imaged with a high spatial resolution using atomic force microscopy. The ridge height nonmonotonically depends on the substrate stiffness, and the dimple depth nonlinearly depends on the droplet size. The capillarity of the substrate overcomes the elasticity of the substrate in dominating the deformations when the elastocapillary length is approximately larger than the droplet contact radius, showing an experimental observation of the elasticity-to-capillarity transition. This study provides an experimental approach to investigate nanoscale elastocapillarity, and the insights have the potential to kick-off future work on the fundamentals of solid mechanics.},
author = {Zhao, Binyu and Bonaccurso, Elmar and Auernhammer, G{\"{u}}nter K. and Chen, Longquan},
doi = {10.1021/acs.nanolett.1c03643},
file = {:Users/takshingchan/Desktop/papers/wetting on elastic surface/RecentDownloaded2022Feb/acs.nanolett.1c03643.pdf:pdf},
issn = {15306992},
journal = {Nano Letters},
keywords = {atomic force microscopy,deformation,elasticity-to-capillarity transition,nanodroplet,soft substrate},
number = {24},
pages = {10361--10367},
pmid = {34882419},
title = {{Elasticity-to-Capillarity Transition in Soft Substrate Deformation}},
volume = {21},
year = {2021}
}
@article{Bico2018,
abstract = {Although negligible at large scales, capillary forces may become dominant for submillimetric objects. Surface tension is usually associated with the spherical shape of small droplets and bubbles, wetting phenomena, imbibition, or the motion of insects at the surface of water. However, beyond liquid interfaces, capillary forces can also deform solid bodies in their bulk, as observed in recent experiments with very soft gels. Capillary interactions, which are responsible for the cohesion of sandcastles, can also bend slender structures and induce the bundling of arrays of fibers. Thin sheets can spontaneously wrap liquid droplets within the limit of the constraints dictated by differential geometry. This review aims to describe the different scaling parameters and characteristic lengths involved in elastocapillarity. We focus on three main configurations, each characterized by a specific dimension: three-dimensional (3D), deformations induced in bulk solids; 1D, bending and bundling of rod-like structures; and 2D, bending and stretching of thin sheets. Although each configuration deserves a detailed review, we hope our broad description provides a general view of elastocapillarity.},
author = {Bico, Jos{\'{e}} and Reyssat, {\'{E}}tienne and Roman, Beno{\^{i}}t},
doi = {10.1146/annurev-fluid-122316-050130},
file = {:Users/takshingchan/Desktop/papers/wetting on elastic surface/RecentDownloaded2022Feb/annurev-fluid-122316-050130 (1).pdf:pdf},
issn = {00664189},
journal = {Annual Review of Fluid Mechanics},
keywords = {Capillarity,Elasticity,Fluid-structure interaction,Interfacial flows},
pages = {629--659},
title = {{Elastocapillarity: When Surface Tension Deforms Elastic Solids}},
volume = {50},
year = {2018}
}
@article{Lopes2012,
abstract = {In this paper the evaporation of sessile water drops on soft viscoelastic substrates is investigated. We demonstrate how the deformation of the substrate close to the triple-phase contact line influences the evaporation of a sessile drop by using surfaces with similar wettability, but different viscoelastic properties. We show that water drops on soft surfaces (Young's modulus ??? 0.02 MPa) evaporate faster than those on hard surfaces (Young's modulus ??? 1.5 MPa). The faster evaporation rates on soft surfaces can be related to a different dynamic evolution of the receding contact angle, which is a direct consequence of the substrate deformation close to the triple-phase contact line. By adjusting the substrate softness we are able to control the transition between constant contact radius and constant contact angle evaporation modes. ??  The Royal Society of Chemistry 2012.},
author = {Lopes, Marcus C. and Bonaccurso, Elmar},
doi = {10.1039/c2sm25958c},
file = {:Users/takshingchan/Desktop/papers/wetting on elastic surface/RecentDownloaded2022Feb/c2sm25958c.pdf:pdf},
issn = {17446848},
journal = {Soft Matter},
number = {30},
pages = {7875--7881},
title = {{Evaporation control of sessile water drops by soft viscoelastic surfaces}},
volume = {8},
year = {2012}
}
@article{Kajiya2013,
abstract = {We studied the dynamics of water sessile droplets advancing on hydrophobic and visco-elastic poly(styrene-butadiene-styrene)(SBS)-paraffin gel substrates at various inflation rates. During the advancing process, the droplet contact line exhibits three different regimes of motions. When the contact line advances at a high velocity, it moves continuously with a constant contact angle. As the contact line slows down, it starts a stick-slip motion: the contact line is pinned at a certain position and then suddenly slips forward. With further decrease of the velocity, the contact line stops the stick-slip motion and continuously advances again. The observed threshold values for the transitions of the contact line motions (continuous-stick-slip-continuous) indicate that the rheology of the gel drastically affects the dynamics of liquid on its surface. We suggest that on visco-elastic gels, the moving contact line exhibits both aspects of wetting on elastic solids and wetting on viscous liquids depending on the characteristic frequency of the gel surface deformation. At an intermediate regime, the stick-slip motion of the contact line appears. We also propose a simple geometrical model in the stick-slip regime which allows us to relate the jumps of the droplet radius to the jumps of the apparent contact angle. {\textcopyright} The Royal Society of Chemistry 2013.},
author = {Kajiya, Tadashi and Daerr, Adrian and Narita, Tetsuharu and Royon, Laurent and Lequeux, Fran{\c{c}}ois and Limat, Laurent},
doi = {10.1039/c2sm26714d},
file = {:Users/takshingchan/Desktop/papers/wetting on elastic surface/RecentDownloaded2022Feb/c2sm26714d-2.pdf:pdf},
issn = {1744683X},
journal = {Soft Matter},
number = {2},
pages = {454--461},
title = {{Advancing liquid contact line on visco-elastic gel substrates: Stick-slip vs. continuous motions}},
volume = {9},
year = {2013}
}
@article{Weijs2013,
abstract = {The capillary forces exerted by liquid drops and bubbles on a soft solid are directly measured using molecular dynamics simulations. The force on the solid by the liquid near the contact line is neither oriented along the liquid vapor interface nor perpendicular to the solid surface, as usually assumed, but points towards the liquid. It is shown that the elastic deformations induced by this force can only be explained if, in contrast to an incompressible liquid, the surface stress is different from the surface energy. Using thermodynamic variations we show that the surface stress and the surface energy can both be determined accurately by measuring the deformation of a slender body plunged in a liquid. The results obtained from molecular dynamics fully confirm those recently obtained experimentally [Marchand et al., Phys. Rev. Lett., (2012), 108, 094301] for an elastomeric wire. {\textcopyright} 2013 The Royal Society of Chemistry.},
archivePrefix = {arXiv},
arxivId = {1303.6779},
author = {Weijs, Joost H. and Andreotti, Bruno and Snoeijer, Jacco H.},
doi = {10.1039/c3sm50861g},
eprint = {1303.6779},
file = {:Users/takshingchan/Desktop/papers/wetting on elastic surface/RecentDownloaded2022Feb/c3sm50861g-2.pdf:pdf},
issn = {1744683X},
journal = {Soft Matter},
number = {35},
pages = {8494--8503},
title = {{Elasto-capillarity at the nanoscale: On the coupling between elasticity and surface energy in soft solids}},
volume = {9},
year = {2013}
}
@article{VanGorcum2020,
abstract = {The spreading of liquid drops on soft substrates is extremely slow, owing to strong viscoelastic dissipation inside the solid. A detailed understanding of the spreading dynamics has remained elusive, partly owing to the difficulty in quantifying the strong viscoelastic deformations below the contact line that determine the shape of moving wetting ridges. Here we present direct experimental visualisations of the dynamic wetting ridge using shadowgraphic imaging, complemented with measurements of the liquid contact angle. It is observed that the wetting ridge exhibits a rotation that follows exactly the dynamic liquid contact angle-as was previously hypothesized [Karpitschka et al., Nat. Commun., 2015, 6, 7891]. This experimentally proves that, despite the contact line motion, the wetting ridge is still governed by Neumann's law. Furthermore, our experiments suggest that moving contact lines lead to a variable surface tension of the substrate. We therefore set up a new theory that incorporates the influence of surface strain, for the first time including the so-called Shuttleworth effect into the dynamical theory for soft wetting. It includes a detailed analysis of the boundary conditions at the contact line, complemented by a dissipation analysis, which shows, again, the validity of Neumann's balance.},
archivePrefix = {arXiv},
arxivId = {1907.08067},
author = {{Van Gorcum}, M. and Karpitschka, S. and Andreotti, B. and Snoeijer, J. H.},
doi = {10.1039/c9sm01453e},
eprint = {1907.08067},
file = {:Users/takshingchan/Desktop/papers/wetting on elastic surface/RecentDownloaded2022Feb/c9sm01453e.pdf:pdf},
issn = {17446848},
journal = {Soft Matter},
number = {5},
pages = {1306--1322},
pmid = {31934702},
publisher = {Royal Society of Chemistry},
title = {{Spreading on viscoelastic solids: Are contact angles selected by Neumann's law?}},
volume = {16},
year = {2020}
}
@article{Lubbers2014,
archivePrefix = {arXiv},
arxivId = {1312.6626},
author = {Lubbers, L. A. and Weijs, J. H. and Botto, L. and Das, S. and Andreotti, B. and Snoeijer, J. H.},
doi = {10.1017/jfm.2014.152},
eprint = {1312.6626},
file = {:Users/takshingchan/Desktop/papers/wetting on elastic surface/RecentDownloaded2022Feb/drops-on-soft-solids-free-energy-and-double-transition-of-contact-angles-2.pdf:pdf},
issn = {14697645},
journal = {Journal of Fluid Mechanics},
keywords = {capillary flows,contact lines,drops},
pages = {R1},
title = {{Drops on soft solids: Free energy and double transition of contact angles}},
volume = {747},
year = {2014}
}
@article{Sun2021,
abstract = {Thermodynamics tells us to expect underwater contact between two hydrophobic surfaces to result in stronger adhesion compared to two hydrophilic surfaces. However, the presence of water changes not only energetics but also the dynamic process of reaching a final state, which couples solid deformation and liquid evacuation. These dynamics can create challenges for achieving strong underwater adhesion/friction, which affects diverse fields including soft robotics, biolocomotion, and tire traction. Closer investigation, requiring sufficiently precise resolution of film evacuation while simultaneously controlling surface wettability, has been lacking. We perform high-resolution in situ frustrated total internal reflection imaging to track underwater contact evolution between soft-elastic hemispheres of varying stiffness and smooth–hard surfaces of varying wettability. Surprisingly, we find the exponential rate of water evacuation from hydrophobic–hydrophobic (adhesive) contact is three orders of magnitude lower than that from hydrophobic–hydrophilic (nonadhesive) contact. The trend of decreasing rate with decreasing wettability of glass sharply changes about a point where thermodynamic adhesion crosses zero, suggesting a transition in mode of evacuation, which is illuminated by three-dimensional spatiotemporal height maps. Adhesive contact is characterized by the early localization of sealed puddles, whereas nonadhesive contact remains smooth, with film-wise evacuation from one central puddle. Measurements with a human thumb and alternatively hydrophobic/hydrophilic glass surface demonstrate practical consequences of the same dynamics: adhesive interactions cause instability in valleys and lead to a state of more trapped water and less intimate solid–solid contact. These findings offer interpretation of patterned texture seen in underwater biolocomotive adaptations as well as insight toward technological implementation.},
author = {Sun, Mengyue and Kumar, Nityanshu and Dhinojwala, Ali and King, Hunter},
doi = {10.1073/pnas.2104975118},
file = {:Users/takshingchan/Desktop/papers/wetting on elastic surface/RecentDownloaded2022Feb/e2104975118.full.pdf:pdf},
issn = {10916490},
journal = {Proceedings of the National Academy of Sciences of the United States of America},
keywords = {Adhesion,Biologica,Contact,Soft–hard contact,Underwater contact mechanics},
number = {41},
pmid = {34615709},
title = {{Attractive forces slow contact formation between deformable bodies underwater}},
volume = {118},
year = {2021}
}
@article{Bardall2020,
abstract = {Fluid droplets can be induced to move over rigid or flexible surfaces under external or body forces. We describe the effect of variations in material properties of a flexible substrate as a mechanism for motion. In this paper, we consider a droplet placed on a substrate with either a stiffness or surface energy gradient and consider its potential for motion via coupling to elastic deformations of the substrate. In order to clarify the role of contact angles and to obtain a tractable model, we consider a 2D droplet. The gradients in substrate material properties give rise to asymmetric solid deformation and to unequal contact angles, thereby producing a force on the droplet. We then use a dynamic viscoelastic model to predict the resulting dynamics of droplets. Numerical results quantifying the effect of the gradients establish that it is more feasible to induce droplet motion with a gradient in surface energy. The results show that the magnitude of elastic modulus gradient needed to induce droplet motion exceeds experimentally feasible limits in the production of soft solids and is therefore unlikely as a passive mechanism for cell motion. In both cases, of surface energy or elastic modulus, the threshold to initiate motion is achieved at lower mean values of the material properties.},
archivePrefix = {arXiv},
arxivId = {1908.09413},
author = {Bardall, Aaron and Chen, Shih Yuan and Daniels, Karen E. and Shearer, Michael},
doi = {10.1093/imamat/hxaa015},
eprint = {1908.09413},
file = {:Users/takshingchan/Desktop/papers/wetting on elastic surface/RecentDownloaded2022Feb/hxaa015 (1).pdf:pdf},
issn = {14643634},
journal = {IMA Journal of Applied Mathematics (Institute of Mathematics and Its Applications)},
keywords = {droplet motion,soft solids},
number = {3},
pages = {495--512},
title = {{Gradient-induced droplet motion over soft solids}},
volume = {85},
year = {2020}
}
@article{Pericet-Camara2008,
abstract = {Sessile liquid drops are predicted to deform an elastic surface onto which they are placed because of the combined action of the liquid surface tension at the periphery of the drop and the capillary pressure inside the drop. Here, we show for the first time the in situ experimental confirmation of the effect of capillary pressure on this deformation. We demonstrate micrometer-scale deformations made possible by using a low Young's modulus material as an elastic surface. The experimental profiles of the deformed surfaces fit well the theoretical predictions for surfaces with a Young's modulus between 25 and 340 kPa. {\textcopyright} 2008 American Chemical Society.},
author = {Pericet-C{\'{a}}mara, Ram{\'{o}}n and Best, Andreas and Butt, Hans J{\"{u}}rgen and Bonaccurso, Elmar},
doi = {10.1021/la801862m},
file = {:Users/takshingchan/Desktop/papers/wetting on elastic surface/RecentDownloaded2022Feb/la801862m.pdf:pdf},
issn = {07437463},
journal = {Langmuir},
number = {19},
pages = {10565--10568},
title = {{Effect of capillary pressure and surface tension on the deformation of elastic surfaces by sessile liquid microdrops: An experimental investigation}},
volume = {24},
year = {2008}
}
@article{Cao2015,
abstract = {Shape deformation of polymeric droplets on gel-like surfaces is studied by using a combination of the molecular dynamics simulations and theoretical calculations. On the basis of the results of molecular dynamics simulations, we have developed a theoretical model of droplet shape deformation on elastic surfaces which takes into account surface and elastic energy contributions. Analysis of simulation results in the framework of this model shows that the equilibrium droplet shape is controlled by the dimensionless parameter $\gamma$SL/GSa, where $\gamma$SL is the surface tension of the substrate/liquid interface, GS is the shear modulus of the substrate, and a is the contact radius of polymeric droplet. This parameter describes crossover between Neumann's triangle conditions for liquid droplets on liquid substrates and Young's law for droplets on rigid substrates. In the limit when the elastocapillary length is much larger than the contact radius, $\gamma$SL/GS 蠑 a, we recover the Neumann's triangle conditions for liquid droplets floating on liquid substrates. However, in the opposite limit, $\gamma$SL/GS 蠐 a, our model reproduces Young's law. The model predictions are in a very good agreement with simulation results and experimental data. (Graph Presented).},
author = {Cao, Zhen and Dobrynin, Andrey V.},
doi = {10.1021/ma501672p},
file = {:Users/takshingchan/Desktop/papers/wetting on elastic surface/RecentDownloaded2022Feb/ma501672p.pdf:pdf},
issn = {15205835},
journal = {Macromolecules},
number = {2},
pages = {443--451},
title = {{Polymeric droplets on soft surfaces: From Neumann's triangle to Young's law}},
volume = {48},
year = {2015}
}
@article{Choi2021,
abstract = {Liquid drops on deformable soft substrates exhibit quite complicated wetting behavior as compared to those on rigid solid substrates. We report on a soft wetting behavior of Co nanoparti-cles (NPs) on a sapphire substrate during pulsed laser-induced dewetting (PLID). Co NPs produced by PLID wetted the sapphire substrate with a contact angle near 70°, which is in contrast to typical dewetting behavior of metal thin films exhibiting contact angles greater than 90°. In addition, a na-noscale $\gamma$-Al2O3 wetting ridge about 15 nm in size and a thin amorphous Al2O3 interlayer were observed around and beneath the Co NP, respectively. The observed soft wetting behavior strongly indicates that the sapphire substrate became soft and deformable during PLID. Moreover, the soft wetting was augmented under PLID in air due to the formation of a CoO shell, resulting in a smaller contact angle near 30°.},
author = {Choi, Jung Won and Ham, Daseul and Han, Seonghyun and Noh, Do Young and Kang, Hyon Chol},
doi = {10.3390/nano11020268},
file = {:Users/takshingchan/Desktop/papers/wetting on elastic surface/RecentDownloaded2022Feb/nanomaterials-11-00268-v2 (2).pdf:pdf},
issn = {20794991},
journal = {Nanomaterials},
keywords = {Co thin films,Deformation of substrate surface,Pulsed laser-induced dewetting,Soft wetting,Wetting ridge},
number = {2},
pages = {1--10},
title = {{Nanoscale soft wetting observed in co/sapphire during pulsed laser irradiation}},
volume = {11},
year = {2021}
}
@article{Zafar2021,
abstract = {Soft solids such as silicone gels, with bulk shear modulus ranging from ∼10 to 1000kPa, exhibit strongly strain-dependent surface stresses. Moreover, unlike conventional stiffer materials, the effects of surface stress in these materials manifest at length scales of tens of micrometers rather than nanometers. However, the calibration of constitutive parameters for surface hyperelasticity has proved to be challenging. Using a reasonably general surface constitutive model, we explore the possibility of obtaining its parameters from force-twist, torque-twist, and force-extension (force-compression) responses of a soft cylinder held between two inert, rigid plates. The motivation behind using these responses is derived from the fact that the roles of the surface constitutive parameters, under suitably ideal conditions, are neatly separated from each other and the three responses easily yield values of the three parameters. Moreover, through large deformation finite-element simulations with coupled bulk and surface hyperelasticity, we delineate the extent to which deviation from the ideal conditions may be tolerated. Using an example with previously reported material parameters, we estimate that, for cylindrical specimens with a radius of the order of 100$\mu$m, the capability to measure forces and torques of the order of 1-100$\mu$N and 103-105$\mu$N-$\mu$m, respectively, will be required to determine the parameters accurately.},
author = {Zafar, M. Rashid and Basu, Sumit},
doi = {10.1103/PhysRevE.103.063003},
file = {:Users/takshingchan/Desktop/papers/wetting on elastic surface/RecentDownloaded2022Feb/PhysRevE.103.063003.pdf:pdf},
issn = {24700053},
journal = {Physical Review E},
keywords = {doi:10.1103/PhysRevE.103.063003 url:https://doi.org/10.1103/PhysRevE.103.063003},
number = {6},
pages = {1--14},
pmid = {34271667},
publisher = {American Physical Society},
title = {{Calibrating surface hyperelastic constitutive models in soft solids}},
volume = {103},
year = {2021}
}
@article{Tamim2021,
abstract = {Dynamic wetting of droplets on soft solids has many industrial and biological applications which require an understanding of the underlying fluid transport mechanism. Here we study the case of a droplet on a viscoelastic substrate of variable thickness which is known to give rise to a spontaneous droplet transport. This phenomenon is known as droplet durotaxis and has been observed experimentally. Here we develop a model assuming a small linear gradient in substrate thickness to reveal the physical mechanism behind this transport phenomena. We show the variable thickness causes an asymmetric deformation along the drop contact line, which causes a variation in the contact angle. This generates a net driving force on the drop, causing it to move in the direction of higher thickness. The resulting drop velocity is determined by balancing the work done by the moving drop with the viscoelastic dissipation of the substrate (viscoelastic braking) and computed from a self-consistent model. We find our results to be in qualitative agreement to previously reported experimental findings.},
author = {Tamim, S. I. and Bostwick, J. B.},
doi = {10.1103/PhysRevE.104.034611},
file = {:Users/takshingchan/Desktop/papers/wetting on elastic surface/RecentDownloaded2022Feb/PhysRevE.104.034611.pdf:pdf},
issn = {24700053},
journal = {Physical Review E},
keywords = {doi:10.1103/PhysRevE.104.034611 url:https://doi.org/10.1103/PhysRevE.104.034611},
number = {3},
pages = {1--10},
pmid = {34654114},
publisher = {American Physical Society},
title = {{Model of spontaneous droplet transport on a soft viscoelastic substrate with nonuniform thickness}},
volume = {104},
year = {2021}
}
@article{Wang2015,
abstract = {We characterize the spatiotemporal deformation of an elastic film during the radial drainage of fluid from a narrowing gap. Elastic deformation of the film takes the form of a dimple and prevents full contact to be reached. With a thinner elastic film the stress becomes increasingly supported by the underlying rigid substrate and the dimple formation is suppressed, which allows the surfaces to reach full contact. We highlight the lag due to viscoelasticity on the surface profiles, and that for a given fluid film thickness deformation leads to stronger hydrodynamic forces than for rigid surfaces.},
author = {Wang, Yumo and Dhong, Charles and Frechette, Joelle},
doi = {10.1103/PhysRevLett.115.248302},
file = {:Users/takshingchan/Desktop/papers/wetting on elastic surface/RecentDownloaded2022Feb/PhysRevLett.115.248302 (1).pdf:pdf},
issn = {10797114},
journal = {Physical Review Letters},
number = {24},
pages = {1--5},
title = {{Out-of-Contact Elastohydrodynamic Deformation due to Lubrication Forces}},
volume = {115},
year = {2015}
}
@article{Masurel2019,
abstract = {Understanding the interfacial properties of solids with their environment is a crucial problem in fundamental science and applications. Elastomers have challenged the scientific community in this respect, and a satisfying description is still missing. Here, we argue that the interfacial properties of elastomers, such as their wettability, can be understood with a nonlinear elastic model with the assumption of a strain-independent surface energy. We show that our model captures accurately available data on elastomer wettability and discuss its implications.},
author = {Masurel, Robin and Roch{\'{e}}, Matthieu and Limat, Laurent and Ionescu, Ioan and Dervaux, Julien},
doi = {10.1103/PhysRevLett.122.248004},
file = {:Users/takshingchan/Desktop/papers/wetting on elastic surface/RecentDownloaded2022Feb/PhysRevLett.122.248004.pdf:pdf},
issn = {10797114},
journal = {Physical Review Letters},
number = {24},
pages = {1--6},
pmid = {31322373},
title = {{Elastocapillary Ridge as a Noninteger Disclination}},
volume = {122},
year = {2019}
}
@article{Zhang2020,
abstract = {We present the first direct measurement of the elastohydrodynamic lift force acting on a sphere moving within a viscous liquid, near and along a soft substrate under nanometric confinement. Using atomic force microscopy, the lift force is probed as a function of the gap size, for various driving velocities, viscosities, and stiffnesses. The force increases as the gap is reduced and shows a saturation at small gap. The results are in excellent agreement with scaling arguments and a quantitative model developed from the soft lubrication theory, in linear elasticity, and for small compliances. For larger compliances, or equivalently for smaller confinement length scales, an empirical scaling law for the observed saturation of the lift force is given and discussed.},
archivePrefix = {arXiv},
arxivId = {1907.05849},
author = {Zhang, Zaicheng and Bertin, Vincent and Arshad, Muhammad and Rapha{\"{e}}l, Elie and Salez, Thomas and Maali, Abdelhamid},
doi = {10.1103/PhysRevLett.124.054502},
eprint = {1907.05849},
file = {:Users/takshingchan/Desktop/papers/wetting on elastic surface/RecentDownloaded2022Feb/PhysRevLett.124.054502.pdf:pdf},
issn = {10797114},
journal = {Physical Review Letters},
keywords = {doi:10.1103/PhysRevLett.124.054502 url:https://doi.org/10.1103/PhysRevLett.124.054502},
number = {5},
pages = {54502},
pmid = {32083893},
publisher = {American Physical Society},
title = {{Direct Measurement of the Elastohydrodynamic Lift Force at the Nanoscale}},
url = {https://doi.org/10.1103/PhysRevLett.124.054502},
volume = {124},
year = {2020}
}
@article{Guan2020,
abstract = {We report direct atomic-force-microscope measurements of capillary force hysteresis (CFH) of a circular contact line (CL) formed on a long glass fiber, which is coated with a thin layer of soft polymer film and intersects a water-air interface. The measured CFH shows a distinct overshoot for the depinning of a static CL, and the overshoot amplitude grows logarithmically with both the hold time $\tau$ and fiber speed V. A unified model based on the slow growth of a wetting ridge and force-assisted barrier crossing is developed to explain the observed time (or state) and speed (or rate) dependent CL depinning dynamics over an aging soft surface. The experimental findings have important implications to a common class of problems involving depinning dynamics in a defect or roughness landscape, such as friction of solid interfaces.},
author = {Guan, Dongshi and Charlaix, Elisabeth and Tong, Penger},
doi = {10.1103/PhysRevLett.124.188003},
file = {:Users/takshingchan/Desktop/papers/wetting on elastic surface/RecentDownloaded2022Feb/PhysRevLett.124.188003.pdf:pdf},
issn = {10797114},
journal = {Physical Review Letters},
keywords = {doi:10.1103/PhysRevLett.124.188003 url:https://doi.org/10.1103/PhysRevLett.124.188003},
number = {18},
pages = {188003},
pmid = {32441979},
publisher = {American Physical Society},
title = {{State and Rate Dependent Contact Line Dynamics over an Aging Soft Surface}},
url = {https://doi.org/10.1103/PhysRevLett.124.188003},
volume = {124},
year = {2020}
}
@article{Bain2021,
abstract = {When stretched in one direction, most solids shrink in the transverse directions. In soft silicone gels, however, we observe that small-scale topographical features grow upon stretching. A quantitative analysis of the topography shows that this counterintuitive response is nearly linear, allowing us to tackle it through a small-strain analysis. We find that the surprising increase of small-scale topography with stretch is due to a delicate interplay of the bulk and surface responses to strain. Specifically, we find that surface tension changes as the material is deformed. This response is expected on general grounds for solid materials, but challenges the standard description of gel and elastomer surfaces.},
archivePrefix = {arXiv},
arxivId = {2104.10578},
author = {Bain, Nicolas and Jagota, Anand and Smith-Mannschott, Katrina and Heyden, Stefanie and Style, Robert W. and Dufresne, Eric R.},
doi = {10.1103/PhysRevLett.127.208001},
eprint = {2104.10578},
file = {:Users/takshingchan/Desktop/papers/wetting on elastic surface/RecentDownloaded2022Feb/PhysRevLett.127.208001.pdf:pdf},
issn = {10797114},
journal = {Physical Review Letters},
keywords = {doi:10.1103/PhysRevLett.127.208001 url:https://doi.org/10.1103/PhysRevLett.127.208001},
number = {20},
pages = {208001},
pmid = {34860052},
publisher = {American Physical Society},
title = {{Surface Tension and the Strain-Dependent Topography of Soft Solids}},
url = {https://doi.org/10.1103/PhysRevLett.127.208001},
volume = {127},
year = {2021}
}
@article{Shuttleworth1950, 
author = {Shuttleworth, R.},
journal = {Proc. Phys. Soc. A},
pages = {444},
title = {{The Surface Tension of Solids}},
volume = {63},
year = {1950}
}
@article{Hui2014,
abstract = {The equilibrium configuration of a liquid drop on a solid is determined by local energy balance. For a very stiff substrate, energy balance is represented by Young's equation. The equilibrium configuration near a line separating three fluids, in contrast, is determined by a balance of forces - their surface tensions - which is represented graphically by Neumann's triangle. We argue that these two are limiting cases of the more general situation of a drop on an elastic substrate in which both configurational energy balance and force balance must be satisfied independently. By analysing deformation close to the contact line of a liquid drop on an elastic substrate, we show that the transition from the surface tension-dominated regime to the elasticitydominated regime is controlled by a dimensionless parameter: the ratio of an elasto-capillary length to the characteristic length scale over which surface tension acts. Because of the influence of substrate elasticity, the contact angle is not necessarily given by Young's equation. For compliant solids, we show that the local deformation and stress fields near the contact line are governed by surface tensions. However, if surface tension happens to be different from surface energy, configurational energy balance may not be consistent with force balance. {\textcopyright} 2014 The Author(s) Published by the Royal Society. All rights reserved.},
author = {Hui, Chung Yuen and Jagota, Anand},
doi = {10.1098/rspa.2014.0085},
file = {:Users/takshingchan/Desktop/papers/wetting on elastic surface/RecentDownloaded2022Feb/rspa.2014.0085.pdf:pdf},
issn = {14712946},
journal = {Proceedings of the Royal Society A: Mathematical, Physical and Engineering Sciences},
keywords = {Contact angle,Neumann's triangle,Soft materials,Surface tension,Young's equation},
number = {2167},
title = {{Deformation near a liquid contact line on an elastic substrate}},
volume = {470},
year = {2014}
}

@article{Dervaux2015,
author = {Dervaux, Julien and Limat, Laurent},
journal = {Proceedings of the Royal Society A: Mathematical, Physical and Engineering Sciences},
number = {20140813},
title = {{Deformation near a liquid contact line on an elastic substrate}},
volume = {471},
year = {2015}
}

@article{Bertin2022,
abstract = {The motion of an object within a viscous fluid and in the vicinity of a soft surface induces a hydrodynamic stress field that deforms the latter, thus modifying the boundary conditions of the flow. This results in elastohydrodynamic interactions experienced by the particle. Here, we derive a soft-lubrication model, in order to compute all the forces and torque applied on a rigid sphere that is free to translate and rotate near an elastic wall. We focus on the limit of small deformations of the surface with respect to the fluid-gap thickness, and perform a perturbation analysis in dimensionless compliance. The response is computed in the framework of linear elasticity, for planar elastic substrates in the limiting cases of thick and thin layers. The EHD forces are also obtained analytically using the Lorentz reciprocal theorem.},
archivePrefix = {arXiv},
arxivId = {2104.00900},
author = {Bertin, Vincent and Amarouchene, Yacine and Rapha{\"{e}}l, Elie and Salez, Thomas},
doi = {10.1017/jfm.2021.1063},
eprint = {2104.00900},
file = {:Users/takshingchan/Desktop/papers/wetting on elastic surface/RecentDownloaded2022Feb/soft-lubrication-interactions-between-a-rigid-sphere-and-an-elastic-wall.pdf:pdf},
issn = {14697645},
journal = {Journal of Fluid Mechanics},
keywords = {colloids,lubrication theory},
pages = {1--21},
title = {{Soft-lubrication interactions between a rigid sphere and an elastic wall}},
volume = {933},
year = {2022}
}

@article{Henkel2021,
abstract = {The wetting of soft elastic substrates exhibits many features that have no counterpart on rigid surfaces. Modelling the detailed elastocapillary interactions is challenging, and has so far been limited to single contact lines or single drops. Here we propose a reduced long-wave model that captures the main qualitative features of statics and dynamics of soft wetting, but which can be applied to ensembles of droplets. The model has the form of a gradient dynamics on an underlying free energy that reflects capillarity, wettability and compressional elasticity. With the model we first recover the double transition in the equilibrium contact angles that occurs when increasing substrate softness from ideally rigid towards very soft (i.e., liquid). Second, the spreading of single drops of partially and completely wetting liquids is considered showing that known dependencies of the dynamic contact angle on contact line velocity are well reproduced. Finally, we go beyond the single droplet picture and consider the coarsening for a two-drop system as well as for a large ensemble of drops. It is shown that the dominant coarsening mode changes with substrate softness in a nontrivial way.},
author = {Henkel, Christopher and Snoeijer, Jacco H. and Thiele, Uwe},
doi = {10.1039/d1sm01032h},
file = {:Users/takshingchan/Downloads/d1sm01032h (1).pdf:pdf},
issn = {17446848},
journal = {Soft Matter},
number = {45},
pages = {10359--10375},
pmid = {34747426},
publisher = {Royal Society of Chemistry},
title = {{Gradient-dynamics model for liquid drops on elastic substrates}},
volume = {17},
year = {2021}
}

@Article{MB05,
     author    = " F. Mugele and J.-C. Baret",
     title     = " Electrowetting: from basics to applications",
     journal   = " J. Phys.: Condens. Matter",
     volume    = " 17",
     year      = " 2005",
     pages     = " R705",
}

@article{Suerez2008,
abstract = {Molecular simulation is becoming a very powerful tool for studying dynamic phenomena in materials. The simulation yields information about interaction at length and time scales unattainable by experimental measurements and unpredictable by continuum theories. This is especially meaningful when referring to bonding between a polymer and a metal substrate. A very important characteristic of polymers is that their physical properties do not rely on the detailed chemical structure of the molecular chains but only on their flexibility, and accordingly they will be able to adopt different conformations. In this paper, a molecular simulation of the bonding between vinyl ester polymer and steel is presented. Four different polymers with increasing chain lengths have been studied. Atomic co-ordinates are adjusted in order to reduce the molecular energy. Conformational changes in the macromolecules have been followed to obtain the polymer pair correlation function. Radius of gyration and end-to-end distance distributions of the individual chains have been used as a quantitative measurement of their flexibility. There exists a correlation between flexibility of the molecular chains and the energy of adhesion between the polymer and the metal substrate. Close contacts between the two materials are established at certain points but every atom up to a certain distance from the interface contributes to the total value of the adhesion energy of the system. {\textcopyright} 2008 VSP.},
author = {Su{\'{e}}rez, J. C. and Miguel, S. and Pinilla, P. and L{\'{o}}pez, F.},
doi = {10.1163/156856108X305732},
file = {:Users/takshingchan/Desktop/Reseach_Teaching2021/Research2020_fromNov/Soft_solid/BEM/Manuscript/Formatiion of wetting ridge_forcus_evolution/Papers to cite/Role of Vertical Component of Surface Tension of the Droplet on the Elastic Deformation of PDMS Membrane.pdf:pdf},
issn = {01694243},
journal = {Journal of Adhesion Science and Technology},
keywords = {Molecular dynamics,Polymer-metal bonds,Simulation},
number = {13},
pages = {1387--1400},
title = {{Molecular dynamics simulation of polymer-metal bonds}},
volume = {22},
year = {2008}
}
@article{Xu2020,
abstract = {Understanding surface mechanics of soft solids, such as soft polymeric gels, is crucial in many engineering processes, such as dynamic wetting and adhesive failure. In these situations, a combination of capillary and elastic forces drives the motion, which is balanced by dissipative mechanisms to determine the rate. While shear rheology (i.e., viscoelasticity) has long been assumed to dominate the dissipation, recent works have suggested that compressibility effects (i.e., poroelasticity) could play roles in swollen networks. We use fast interferometric imaging to quantify the relaxation of surface deformations due to a displaced contact line. By systematically measuring the profiles at different time and length scales, we experimentally observe a crossover from viscoelastic to poroelastic surface relaxations.},
archivePrefix = {arXiv},
arxivId = {2006.09767},
author = {Xu, Qin and Wilen, Lawrence A. and Jensen, Katharine E. and Style, Robert W. and Dufresne, Eric R.},
doi = {10.1103/PhysRevLett.125.238002},
eprint = {2006.09767},
file = {:Users/takshingchan/Desktop/Reseach_Teaching2021/Research2020_fromNov/Soft_solid/BEM/Manuscript/Formatiion of wetting ridge_forcus_evolution/Papers to cite/PhysRevLett.125.238002.pdf:pdf},
issn = {10797114},
journal = {Physical Review Letters},
keywords = {doi:10.1103/PhysRevLett.125.238002 url:https://doi.org/10.1103/PhysRevLett.125.238002},
number = {23},
pages = {238002},
pmid = {33337191},
publisher = {American Physical Society},
title = {{Viscoelastic and Poroelastic Relaxations of Soft Solid Surfaces}},
url = {https://doi.org/10.1103/PhysRevLett.125.238002},
volume = {125},
year = {2020}
}

@article{Hui2016,
abstract = {We study the effect of surface tension on the flattening of a surface perturbed by a point load subsequent to its removal. The surface bounds an infinite isotropic linear viscoelastic incompressible half space. The point load is initially applied for a sufficiently long time so that the half space is fully relaxed before the load removal. An exact solution is obtained assuming small deformation. We then specialize our theory to the case of a standard viscoelastic solid. There is an initial reduction of the surface displacement immediately after load removal that is found to be directly proportional to the ratio of applied load to surface tension. This is followed by a temporal decay of the surface profile that depends only on the relaxation time and the long and short time moduli of the viscoelastic solid. Our work also provides the Green's function for a suddenly applied point load on the surface of a viscoelastic half space.},
author = {Hui, Chung Yuen and Jagota, Anand},
doi = {10.1002/polb.23920},
file = {:Users/takshingchan/Desktop/Reseach_Teaching2021/Research2020_fromNov/Soft_solid/BEM/Manuscript/Formatiion of wetting ridge_forcus_evolution/Papers to cite/J Polym Sci B Polym Phys - 2015 - Hui - Effect of surface tension on the relaxation of a viscoelastic half‐space perturbed.pdf:pdf},
issn = {10990488},
journal = {Journal of Polymer Science, Part B: Polymer Physics},
keywords = {elasto-capillary length,surface tension,viscoelastic relaxation},
number = {2},
pages = {274--280},
title = {{Effect of surface tension on the relaxation of a viscoelastic half-space perturbed by a point load}},
volume = {54},
year = {2016}
}
@article{Berman2019,
abstract = {We characterize the mechanical recovery of compliant silicone gels following adhesive contact failure. We establish broad, stable adhesive contacts between rigid microspheres and soft gels, then stretch the gels to large deformations by pulling quasi-statically on the contact. Eventually, the adhesive contact begins to fail, and ultimately slides to a final contact point on the bottom of the sphere. Immediately after detachment, the gel recoils quickly with a self-similar surface profile that evolves as a power law in time, suggesting that the adhesive detachment point is singular. The singular dynamics we observe are consistent with a relaxation process driven by surface stress and slowed by viscous flow through the porous, elastic network of the gel. Our results emphasize the importance of accounting for both the liquid and solid phases of gels in understanding their mechanics, especially under extreme deformation.},
archivePrefix = {arXiv},
arxivId = {1810.05329},
author = {Berman, Justin D. and Randeria, Manjari and Style, Robert W. and Xu, Qin and Nichols, James R. and Duncan, Aidan J. and Loewenberg, Michael and Dufresne, Eric R. and Jensen, Katharine E.},
doi = {10.1039/c8sm02075b},
eprint = {1810.05329},
file = {:Users/takshingchan/Desktop/Reseach_Teaching2021/Research2020_fromNov/Soft_solid/BEM/Manuscript/Formatiion of wetting ridge_forcus_evolution/Papers to cite/c8sm02075b.pdf:pdf},
issn = {17446848},
journal = {Soft Matter},
number = {6},
pages = {1327--1334},
pmid = {30540331},
publisher = {Royal Society of Chemistry},
title = {{Singular dynamics in the failure of soft adhesive contacts}},
volume = {15},
year = {2019}
}
@article{Zhao2017,
abstract = {Elastocapillarity describes the deformations of soft materials by surface tensions and is involved in a broad range of applications, from microelectromechanical devices to cell patterning on soft surfaces. Although the vast majority of elastocapillarity experiments are performed on soft gels, because of their tunable mechanical properties, the theoretical interpretation of these data has been so far undertaken solely within the framework of linear elasticity, neglecting the porous nature of gels. We investigate in this work the deformation of a thick poroelastic layer with surface tension subjected to an arbitrary distribution of time-dependent axisymmetric surface forces. Following the derivation of a general analytical solution, we then focus on the specific problem of a liquid drop sitting on a soft poroelastic substrate. We investigate how the deformation and the solvent concentration field evolve in time for various droplet sizes. In particular, we show that the ridge height beneath the triple line grows logarithmically in time as the liquid migrates toward the ridge. We then study the relaxation of the ridge following the removal of the drop and show that the drop leaves long-lived footprints after removal which may affect surface and wetting properties of gel layers and also the motion of living cells on soft materials. Preliminary experiments performed with water droplets on soft PDMS gel layers are in excellent agreement with the theoretical predictions.},
author = {Zhao, Menghua and Lequeux, Fran{\c{c}}ois and Narita, Tetsuharu and Roch{\'{e}}, Matthieu and Limat, Laurent and Dervaux, Julien},
doi = {10.1039/c7sm01757j},
file = {:Users/takshingchan/Desktop/Reseach_Teaching2021/Research2020_fromNov/Soft_solid/BEM/Manuscript/Formatiion of wetting ridge_forcus_evolution/Papers to cite/c7sm01757j.pdf:pdf},
issn = {17446848},
journal = {Soft Matter},
number = {1},
pages = {61--72},
pmid = {29135008},
title = {{Growth and relaxation of a ridge on a soft poroelastic substrate}},
volume = {14},
year = {2017}
}

@article{Shi2022,
  title = {Elastocapillarity at Cell-Matrix Contacts},
  author = {Shi, Xuechen and Liu, Zezhou and Feng, Luyi and Zhao, Tiankai and Hui, Chung-Yuen and Zhang, Sulin},
  journal = {Phys. Rev. X},
  volume = {12},
  issue = {2},
  pages = {021053},
  numpages = {11},
  year = {2022},
  month = {Jun},
  publisher = {American Physical Society},
  doi = {10.1103/PhysRevX.12.021053},
  url = {https://link.aps.org/doi/10.1103/PhysRevX.12.021053}
}

@article{Dervaux2020,
author = {Dervaux, Julien and Roch{\'{e}}, Matthieu and Limat, Laurent},
issn = {17446848},
journal = {Soft Matter},
number = {22},
pages = {5157--5176},
pmid = {32458883},
title = {{Nonlinear theory of wetting on deformable substrates}},
volume = {16},
year = {2020}
}

@article{chan2017,
	Author = {Chan, Tak Shing and McGraw, Joshua D. and Salez, Thomas and Seemann, Ralf and Brinkmann, Martin},
Journal = {Journal of Fluid Mechanics},
Pages = {271--288},
Publisher = {Cambridge University Press},
Title = {Morphological evolution of microscopic dewetting droplets with slip},
Volume = {828},
Year = {2017},
Bdsk-Url-1 = {https://doi.org/10.1017/jfm.2017.515}
}

@article{McGraw16,
	Author = {J. D. McGraw and T. S. Chan and S. Maurer and T. Salez and M. Benzaquen and E. Rapha{\"{e}}l and M. Brinkmann and K. Jacobs},
	Journal = {PNAS},
	Number = {5},
	Pages = {1168},
	Title = {Slip-mediated dewetting of polymer microdroplets},
	Volume = {113},
	Year = {2016}}
